# Supplementary material for: Variables associated with COVID-19 severity: an observational study of non-paediatric confirmed cases from the general population of the Basque Country, Spain
Source: PubMed Central journal article supplement — BMJ Open. 2021 Apr 1;11(4):e049066. doi: 10.1136/bmjopen-2021-049066 (PMC8024058; doi:10.1136/bmjopen-2021-049066), 2021-04-01
Supplement: bmjopen-2021-049066.draft_revisions.pdf [file bmjopen-2021-049066.draft_revisions.pdf]

# BMJ Open

BMJ Open is committed to open peer review. As part of this commitment we make the peer review history of every article we publish publicly available.

When an article is published we post the peer reviewers' comments and the authors' responses online. We also post the versions of the paper that were used during peer review. These are the versions that the peer review comments apply to.

The versions of the paper that follow are the versions that were submitted during the peer review process. They are not the versions of record or the final published versions. They should not be cited or distributed as the published version of this manuscript.

BMJ Open is an open access journal and the full, final, typeset and author-corrected version of record of the manuscript is available on our site with no access controls, subscription charges or pay-per-view fees (<http://bmjopen.bmj.com>).

If you have any questions on BMJ Open's open peer review process please email [info.bmjopen@bmj.com](mailto:info.bmjopen@bmj.com)

# BMJ Open

## Variables associated to COVID-19 severity: an observational study of >13000 confirmed cases in the Basque Country, Spain

|                               |                                                                                                                                                                                                                                                                                                                                                                      |
|-------------------------------|----------------------------------------------------------------------------------------------------------------------------------------------------------------------------------------------------------------------------------------------------------------------------------------------------------------------------------------------------------------------|
| Journal:                      | <i>BMJ Open</i>                                                                                                                                                                                                                                                                                                                                                      |
| Manuscript ID                 | bmjopen-2021-049066                                                                                                                                                                                                                                                                                                                                                  |
| Article Type:                 | Original research                                                                                                                                                                                                                                                                                                                                                    |
| Date Submitted by the Author: | 14-Jan-2021                                                                                                                                                                                                                                                                                                                                                          |
| Complete List of Authors:     | Vrotsou, Kalliopi; Biodonostia Instituto de Investigación Sanitaria, Grupo de AP<br>Rotaeché, Rafael; Osakidetza-Basque Health Service, Centro de Salud de Alza<br>Mateo-Abad, Maider; Kronikgune<br>Machón, Mónica; Biodonostia Instituto de Investigación Sanitaria, Grupo de AP<br>Vergara, Itziar; Biodonostia Instituto de Investigación Sanitaria, Grupo de AP |
| Keywords:                     | COVID-19, Public health < INFECTIOUS DISEASES, STATISTICS & RESEARCH METHODS                                                                                                                                                                                                                                                                                         |
|                               |                                                                                                                                                                                                                                                                                                                                                                      |

SCHOLARONE™  
Manuscripts

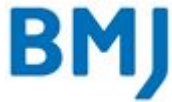

I, the Submitting Author has the right to grant and does grant on behalf of all authors of the Work (as defined in the below author licence), an exclusive licence and/or a non-exclusive licence for contributions from authors who are: i) UK Crown employees; ii) where BMJ has agreed a CC-BY licence shall apply, and/or iii) in accordance with the terms applicable for US Federal Government officers or employees acting as part of their official duties; on a worldwide, perpetual, irrevocable, royalty-free basis to BMJ Publishing Group Ltd ("BMJ") its licensees and where the relevant Journal is co-owned by BMJ to the co-owners of the Journal, to publish the Work in this journal and any other BMJ products and to exploit all rights, as set out in our [licence](#).

The Submitting Author accepts and understands that any supply made under these terms is made by BMJ to the Submitting Author unless you are acting as an employee on behalf of your employer or a postgraduate student of an affiliated institution which is paying any applicable article publishing charge ("APC") for Open Access articles. Where the Submitting Author wishes to make the Work available on an Open Access basis (and intends to pay the relevant APC), the terms of reuse of such Open Access shall be governed by a Creative Commons licence – details of these licences and which [Creative Commons](#) licence will apply to this Work are set out in our licence referred to above.

Other than as permitted in any relevant BMJ Author's Self Archiving Policies, I confirm this Work has not been accepted for publication elsewhere, is not being considered for publication elsewhere and does not duplicate material already published. I confirm all authors consent to publication of this Work and authorise the granting of this licence.

**Title page:****Title:**

**Variables associated to COVID-19 severity: an observational study of >13000 confirmed cases in the Basque Country, Spain.**

**Authors:**

Kalliopi Vrotsou (0000-0002-3296-3923)<sup>1,2,3</sup>, Rafael Rotaecche<sup>1,2,4</sup>, Maider Mateo-Abad(0000-0003-2541-8166)<sup>2,3</sup>, Mónica Machón (0000-0001-6379-0351)<sup>1,2,3</sup>, Itziar Vergara(0000-0001-9671-7898)<sup>1,2,3</sup>

**Addresses:**

1. Instituto de Investigación Sanitaria Biodonostia, Grupo de Atención Primaria, San Sebastián, Spain.
2. Red de Investigación en Servicios de Salud en Enfermedades Crónicas (REDISSEC), Baracaldo, Spain.
3. Instituto de Investigación en Servicios de Salud Kronikgune, Baracaldo, Spain.
4. Osakidetza, Centro de Salud de Alza, San Sebastián, Spain

**Authors' position:**

Kalliopi Vrotsou: biostatistician.

Rafael Rotaecche: general practitioner.

Maider Mateo-Abad: biostatistician.

Monica Machón: investigator

Itziar Vergara: director of the Grupo de Atención Primaria, IIS Biodonostia

**Corresponding author:** Kalliopi Vrotsou,

Address: IIS Biodonostia, Paseo Dr. Beguiristain 20014, San Sebastián Spain,

Telephone number: +34 943006086

e-mail: KALLIOPI.VROTSOUKANARI@osakidetza.eus

The Corresponding Author has the right to grant on behalf of all authors and does grant on behalf of all authors, a worldwide licence to the Publishers and its licensees in perpetuity, in all forms, formats and media (whether known now or created in the future), to i) publish, reproduce, distribute, display and store the Contribution, ii) translate the Contribution into other languages, create adaptations, reprints, include within collections and create summaries, extracts and/or, abstracts of the Contribution, iii) create any other derivative work(s) based on the Contribution, iv) to exploit all subsidiary rights in the Contribution, v) the inclusion of electronic links from the Contribution to third party material where-ever it may be located; and, vi) licence any third party to do any or all of the above.

## Abstract

**Objectives:** To investigate which were the most relevant sociodemographic and clinical variables associated to COVID-19 severity, and uncover how their inter-relations may have affected such severity.

**Design:** A retrospective observational study based on electronic health record data.

**Participants:** Individuals  $\geq 14$  years old with a positive PCR or serology test, between the 28th of February and 31<sup>st</sup> of May, belonging to the Basque Country (Spain) public health system. Institutionalised and individuals admitted to a Hospital at Home unit were excluded from the study.

**Main outcome measure:** Three severity categories were established, primary care, hospital/ICU admission and exitus.

**Results:** A total of  $n=14197$  cases fulfilled the inclusion criteria. Most variables presented statistically significant associations with the outcome ( $p<0.0001$ ). The CART recursive partitioning methodology (based on  $n=13792$ ) suggested that among all associations, those with, age, sex, stratification of patient health care complexity, chronic consumption of blood and blood forming organ, and nervous system drugs, as well as the total number of chronic ATC types were the most relevant. Psychosis also emerged as a potential factor.

**Conclusions:** Older cases are more likely to experience more severe outcomes. However, the sex, underlying health status and chronic drug consumption may interfere and alter the aging effect. Understanding the factors related to the outcome severity is of key importance when designing and promoting public health intervention plans for the COVID-19 pandemic.

### Strengths and limitations of this study

- Over 13000 confirmed COVID-19, non institutionalised,  $\geq 14$  years old cases were explored
- Electronic health records data were a valuable source of information in this study
- The three-category outcome severity: primary care only, hospitalized/ICU care, and exitus was studied in a joint manner
- The CART methodology allowed exploring the big sample and the numerous variables of interest in a flexible way
- Asymptomatic cases were probably not included in this sample as during the first pandemic wave individuals with symptoms were mainly tested for the virus

## Introduction

The COVID-19 disease, caused by the new coronavirus SARS-Cov-2 was initiated in December 2019 in China. On the 12<sup>th</sup> March 2020 the World Health Organization (WHO) declared it a pandemic. Its rapid expansion, along with the high death toll and the serious health aftermaths, have rendered the COVID-19 outbreak as one of the worst health crises in almost a century worldwide.

Since the first cases were detected in Spain the statistics have situated this country among the most affected in Europe, both in terms of total cases and in deaths per million people(1). International literature on COVID-19 is rapidly growing(2–7). The research conducted so far in Spain, has focused mainly on predicting the evolution of the pandemic(8), describing hospitalized individuals(9), or assessing the factors related to the risk of death(10,11). In its most recent publication, the Working group for the surveillance and control of COVID-19 in Spain, presented the factors affecting the outcomes of hospitalisation, as well as ICU admission and death for hospitalized individuals only(12). These outcomes were treated separately; each compared to cases not presenting the corresponding outcome. Therefore, studies that integrate information from different health care levels, analysing the data as a whole and applying statistical methods capable of considering the gradient of outcome severity are lacking.

The autonomous community of the Basque Country, situated in the North of Spain, has its own public health system (Osakidetza), which offers sanitary coverage to some 2.3 million people. Since 2009 Osakidetza has promoted an integrated health care model, by coordinating its different care levels and offering a more holistic approach on patient care(13). It counts with an extensive electronic health records infrastructure, where information on patient health data and episodes of care are stored. The objective of the present observational study was to describe a big series of COVID-19 infected individuals, during the first wave of the pandemic, establish their severity level, based on electronic health record data, and explore what characteristics may be associated to that severity. In particular, we were interested in understanding the structure and inter-relations

1  
2  
3 of different variables, identifying those that may have affected outcome severity the most. To  
4  
5 this end, the Classification and Regression Trees (CART) methodology was applied. This  
6  
7 statistical tool is suitable for exploring and uncovering complex relations, particularly useful  
8  
9 when analysing big data sets(14).  
10

## 11 12 13 14 15 **Methods**

### 16 17 18 *Data source and variables*

19  
20 All information was extracted from the electronic health records of the Basque Country Public  
21  
22 Health System-Osakidetza, via the Osakidetza Business Intelligence (OBI) tools. Data extraction  
23  
24 covered the period between 28<sup>th</sup> February 2020 and 31<sup>st</sup> May 2020; corresponding to the first  
25  
26 detected case in the Basque Country and the end of the first pandemic wave in Spain. Only  
27  
28 individuals  $\geq 14$  years old with a COVID-19 positive Polymerase Chain Reaction (PCR) or  
29  
30 antibody test, were included. No antigen tests were performed at that time. Cases living in  
31  
32 residential homes and those admitted to a hospital at home unit were excluded.  
33  
34

35  
36 The following variables were studied. Age, sex and income level derived by the pharmaceutical  
37  
38 co-payment scheme (<18,000 €, 18,000-100,000 €, >100,000 €). Chronic medication consumption  
39  
40 was explored using the Anatomical Therapeutic Chemical (ATC) system at the first level.  
41  
42 Polypharmacy, defined as the consumption of 5 or more chronic drugs, and the number of ATC  
43  
44 types consumed were derived. Chronic pathologies based on ICD-9 codes, COVID-19 symptoms  
45  
46 registered during consultations and flu vaccination in the year 2019. The Osakidetza stratification  
47  
48 according to patient health care complexity was also studied. Based on a series of health data, and  
49  
50 the use of health services during the previous year, this variable classifies individuals into four  
51  
52 categories, ranging from less to more severe: prevention and promotion of healthy population,  
53  
54 self-management support, disease management, and case management. Pluripathological  
55  
56 individuals belong to the last category. This classification is renewed at the beginning of every  
57  
58  
59  
60

1  
2  
3 calendar year, for all individuals  $\geq 14$ -years, registered in the Osakidetza system at least during  
4  
5 the previous 6 months. A detailed description can be found elsewhere(15).  
6  
7

8 Given that the data were anonymous and clinical analyses could not be conducted, it was assumed  
9  
10 that the severity of a case would be indicated by the most demanding level of medical attention  
11  
12 received, within the study period. Four severity levels were initially identified: primary care  
13  
14 attention only (PC), hospitalisation without intensive care unit admission (Hospital), intensive  
15  
16 care unit admission (ICU), and Exitus. During the pandemic, several emergency ICU units were  
17  
18 set-up within hospitals across the Basque Country. Nevertheless, this information was not  
19  
20 reflected in the electronic health records. As a result, cases admitted to such ICUs appeared as  
21  
22 hospital admissions. This imposed the necessity to merge Hospital and ICU admissions into one  
23  
24 category in the current work. Cases meeting the inclusion criteria were included only once in the  
25  
26 current analyses. The project has been approved by the ethics committee CEIm de Euskadi at  
27  
28 22/07/2020 (reference code: PI2020087).  
29  
30

### 31 ***Patient and public involvement***

32  
33  
34 Due to the study design, no patient and public involvement was considered. Nonetheless, two of  
35  
36 the authors are medical doctors, which has offered valuable support during this work.  
37  
38

### 39 ***Statistical analysis***

40  
41  
42 Continuous variables are presented as means with standard deviations (SD), while medians and  
43  
44 interquartile ranges (Q1, Q3) are given for discrete variables. Categorical variables are presented  
45  
46 with frequencies and percentages (%). Comparisons were performed with the one-way ANOVA,  
47  
48 Kruskal-Wallis and chi-square test, respectively. The Jonckheere-Terpstra and Mantel-Haenszel  
49  
50 chi-square, both testing for a trend along the three severity groups were additionally tested(16).  
51  
52

### 53 ***CART***

54  
55  
56 The CART is a non-parametric, recursive partitioning methodology. A CART tree starts with the  
57  
58 root node, containing all the sample. At each step of the recursive process, every node may split  
59  
60



1  
2  
3 into offspring nodes. Nodes that split are called internal, and those that do not split any further  
4 are called terminal. The tree splits are based on the most important variables, among all candidate  
5 variables fed into the model. These splits intend to minimize the variability of the target variable  
6 within each offspring node, resulting in the most homogenous nodes, as far as the outcome  
7 variable is concerned(14). Splitting was based on the entropy criterion and each variable was  
8 allowed only once per tree branch. For a stopping rule, the number of terminal nodes, and the  
9 observations included in each of them were considered. A tree with 10 terminal nodes, each  
10 including at least 1% of the valid sample data was selected. Cost-complexity pruning was applied.  
11 Variables with significance levels  $p > 0.010$  in the three-group comparisons and those with a total  
12 frequency  $< 1\%$  of the valid sample were excluded from the CART stage. Missing data were  
13 omitted. Analyses were performed with the SAS software version 9.4 (Copyright (c) 2016 by SAS  
14 Institute Inc., Cary, NC, USA.). The PROC HPSPLIT function was used for tree construction.  
15  
16  
17  
18  
19  
20  
21  
22  
23  
24  
25  
26  
27  
28  
29  
30  
31  
32  
33  
34

## 35 **Results**

36  
37 A total of  $n=14197$  COVID-19 cases fulfilled the inclusion criteria. Of those  $n=9722$  (68.5%)  
38 received PC only,  $n=3710$  (26.1%) had a hospital or ICU admission ( $n=3630$  and  $80$ ,  
39 respectively), and  $n=765$  died (5.4%). Table 1 presents the baseline information of the sample.  
40 Overall, mean age was  $53.7$  (SD:17.4) years. Age increased with outcome severity. Most infected  
41 cases were females but more males were observed in the Hospital/ICU and Exitus groups. As far  
42 as the health care complexity stratification variable was concerned the PC group presented the  
43 highest percentage of healthy individuals (36.1%), while case management was most prevalent in  
44 the Exitus group (36.6%). Based on the available information, individuals with an annual income  
45  $< 18.000$  euros were more prevalent in the Hospital/ICU and Exitus groups, and those with higher  
46 income remained mostly in PC. Finally, the Exitus group had the highest percentage of individuals  
47 with a flu vaccination in the year 2019. This observation was consistent for cases  $< 65$  and  $\geq 65$   
48  
49  
50  
51  
52  
53  
54  
55  
56  
57  
58  
59  
60

1  
2  
3 years of age, while percentages differed between age groups. All comparisons were statistically  
4  
5 significant.  
6  
7  
8  
9

10  
11 Chronic medication consumption data are presented in **Table 2**. Overall, the most consumed  
12 medications were those for the nervous system (38.7%), alimentary tract and metabolism (33.0%),  
13 and cardiovascular system (30.2%). With the exception of musculo-skeletal system and  
14 antiparasitic products, insecticides and repellents, the same trend was observed in all other ATC  
15 types. The consumption of alimentary tract and metabolism disorders (A), blood and blood  
16 forming organs (B), cardiovascular system (C), and nervous system diseases drugs (N) drugs  
17 exceeded 60% in the Exitus group. Both polypharmacy and the number of ATC types consumed  
18 was associated with infection severity.  
19  
20  
21  
22  
23  
24  
25  
26  
27  
28  
29  
30  
31  
32

33 As far as chronic diseases were concerned, the most prevalent condition was related to mental  
34 pathologies (**Table 3**). In particular, 30% of the sample had received a diagnosis corresponding  
35 to the ICD-9 neurotic, personality or other nonpsychotic mental disorder. Hypertension was the  
36 next more prevalent condition (21%), followed by diseases of the blood and blood forming organs  
37 (11.5%), chronic obstructive pulmonary disease and allied conditions, as well as diseases of the  
38 esophagus, stomach and duodenum (both 10.4%). Diabetes mellitus was present in 8.5% of the  
39 sample. With the exception of neurotic, personality or other nonpsychotic conditions, that  
40 presented the same distribution along the three outcome groups, the prevalence of the most  
41 frequent pathologies increased with COVID-19 severity. A similar trend was seen in the total  
42 number of chronic diseases.  
43  
44  
45  
46  
47  
48  
49  
50  
51  
52  
53  
54  
55  
56  
57  
58  
59  
60

## **CART**

The CART process indicated that age, sex, health care complexity stratification, blood and blood forming organ medication (B), as well as nervous system drugs (N) along with the frequency of ATC types consumed would be the most relevant variables in understanding the main case characteristics associated to the outcome. During this process the variable of psychoses was also flagged as important. In spite of its low prevalence (2.9%) psychoses was given a lot of weight in the older section of the population. The inclusion of this pathology resulted in a less parsimonious model; with ATC-N drugs placed in an additional tree level. Nonetheless, given that psychoses was the single variable resulting in a node with an exitus majority, and that other authors have already suggested an association between antipsychotic drugs and mortality in COVID-19 cases (10), presenting the corresponding findings was considered of relevance. Therefore, the CART process was repeated twice, first excluding and afterwards including psychoses.

### *Excluding psychoses*

The tree generated by the CART process is depicted in **Figure 1A**. Most cases <64.7 years of age (81.4%, node 1) received mainly PC attention. In this tree branch males presented 15.3% more Hospital/ICU compared to females. Among males, those with worse health (node 8) had 19.2% more Hospital/ICU admissions, compared to the rest (node 7). The majority of males with worse baseline health status who consumed  $\geq 3$  ATC types experienced a Hospital/ICU admission.

Cases  $\geq 64.7$  years of age had mainly a Hospital/ICU outcome (52.6%), with a considerable Exitus prevalence (21.2%). Those with worse baseline health (node 6) had 4.6% more Hospital/ICU admissions and 15.8% more Exitus, compared to the rest. Cases with better baseline health status (node 5) were further split according to ATC-B consumption. Exitus for blood and blood forming organ drugs consumers was experienced in 23.2% of the cases, with the same outcome being 9.1% in non-consumers. Within this last group (node 9) the majority of females received PC

1  
2  
3 attention, while Hospital/ICU was the most prevalent outcome in males. In a similar way, among  
4  
5 node 6 cases, males presented worse evolution than females. Finally, males consuming chronic  
6  
7 medications for the nervous system (node 18) had 17.9% more Exitus compared to non-  
8  
9 consumers. The 10 terminal nodes can easily be ordered less severe (i.e. <64.7 year old females,  
10  
11 node 3) to most severe outcomes groups (i.e.  $\geq 64.7$  year old disease and case management males  
12  
13 who consume nervous system drugs, node 10).  
14  
15  
16  
17  
18

### 19 *Including psychoses*

20  
21  
22 The resulting CART model when the variable of psychoses was included in the recursive process  
23  
24 is presented in **Figure 1B**. Psychoses, was one of the main variables of this model, and the single  
25  
26 split variable for node 6. Inclusion of this pathology added one more level to the CART tree, with  
27  
28 chronic nervous system drugs being a split variable for node 15. Cases with psychoses had a 50%  
29  
30 Exitus. The ATC-N consumers presented less PC and higher Exitus compared to non-consumers.  
31  
32 No other changes were observed compared to the Figure 1A model. In this case the most severe  
33  
34 outcome group was was  $\geq 64.7$  year old disease and case management cases with psychosis (node  
35  
36 12).  
37  
38  
39  
40  
41  
42  
43  
44  
45  
46  
47  
48  
49  
50  
51  
52  
53  
54  
55  
56  
57  
58  
59  
60

## Discussion

The present work has studied the sociodemographic and clinical characteristics of a big number of Spanish COVID-19 cases of the first pandemic wave. According to the information extracted from electronic health record data, the variables of age, sex, previous pathologies and chronic drug consumption may be decisive in understanding infection severity.

Both age and male sex have been flagged as important risk factors by previous COVID-19 research(2,3,7,10–12,17). The importance of age is probably undisputable, given the deterioration of the body's immunity mechanisms and the loss of its capacity to adapt to the environment (18). The present data appears to reflect this known aging effect. In relation to the variable of sex, females presented consistently higher PC and lower Hospital/ICU in the splits where sex was present. With female Exitus being lower in two of them. Data from various European countries have highlighted that females have better COVID-19 infection outcomes than males(19). In spite of the fact that females are considered to have stronger immunity systems(20), the exact mechanisms responsible for these differences are unclear, and probably multifactorial(19). The current data, in conjunction with previous evidence call for a better understanding of the role of sex, in the current pandemic. Sex-specific analyses of future wave data should be planned. But more importantly, high quality prospective studies collecting sex-disaggregated data are needed(21).

The health care complexity stratification variable was present in both main tree arms. It should be mentioned that the way CART divided this 4-category variable into a binary one, by merging the two less severe vs. the two more severe groups was imposed by the data, not the investigators. Worse health status at the time of the infection, was associated to more hospitalizations for younger cases, and mainly to more deaths among older individuals. The inclusion of this stratification variable in the CART model is a relevant finding. Tools that stratify the general population, identifying those at greater risk, can be an asset for public health prevention programs. In the COVID-19 literature, the stratification approach has so far mainly focused on hospitalized patients(11,22,23). While one meta-analysis of in-hospital cases claimed that in COVID-19

1  
2  
3 infections underlying health conditions are even more important than age(24). Our data suggest  
4 that, at least at the local level, this very stratification variable can offer valuable information and  
5 its implementation may worth be considered when setting up public health action plans. Study of  
6 similar indicators used in other health systems would be encouraged.  
7  
8  
9  
10

11  
12 As far as the drug consumption was concerned, chronic blood and blood forming organ drugs (B)  
13 and drugs for the nervous system (N), both appeared as important variables for cases  $\geq 64.7$  years  
14 of age. Cases consuming those drugs presented higher severity levels. ATC-N was the most  
15 frequent medication across all three outcome groups. ATC-B had the steepest raising in  
16 consumption from one severity level to the next. Several neurological manifestations after a  
17 COVID-19 infection have been described in the literature, with the virus perceived by certain  
18 authors as a threat for the whole nervous system(25). It is probable that individuals already  
19 suffering by chronic neurological conditions may be indeed more likely to present worse  
20 outcomes once infected(26,27). Blood related parameters like systolic and diastolic pressure, red  
21 and white cell counts, platelets, lymphocytes, among others, have been highlighted as significant  
22 predictors in different COVID-19 diagnostic models(7). An association between certain ATC-B  
23 drugs and higher odds of death in infected cases has also been observed(10). Chronic  
24 anticoagulation treatment, is referenced as protective against COVID-19 mortality by some(28),  
25 and ineffective by others(29). COVID-19 cases present a high frequency of thrombotic events,  
26 which is leading to an expansion of anticoagulation drug use when treating the disease (30). But  
27 in patients already receiving such drugs prior to infection, drug-drug interactions and infection  
28 severity should be carefully assessed before any antiviral therapy is given, or switching from oral  
29 to parenteral antithrombotic administration(31). Worse severity seen among ATC-B consumers  
30 in the current data may reflect also an increased risk for patients already under anticoagulation  
31 therapy. Poor outcomes due to therapeutic decisions and drug-drug interactions cannot be  
32 excluded either. Our continuing COVID-19 work will refine future data explorations. Obtaining  
33 for example ATC data at the second or third level, as well as information of in-patient treatments  
34 will offer more insight into these associations.  
35  
36  
37  
38  
39  
40  
41  
42  
43  
44  
45  
46  
47  
48  
49  
50  
51  
52  
53  
54  
55  
56  
57  
58  
59  
60

1  
2  
3 Psychoses was a relevant variable in the CART process. Antipsychotic drugs belong to the ATC-  
4  
5 N; which is probably why allowing for the inclusion of psychoses relocated this drug type further  
6  
7 down in the tree structure. Older patients with worse baseline health and psychoses had the highest  
8  
9 death rate among all CART nodes. We can only hypothesize over the mechanisms that could  
10  
11 explain such a finding. On one hand, individuals with psychotic disorders present excess mortality  
12  
13 compared to the general population, mainly due to lifestyle choices, associated comorbidities and  
14  
15 medication side effects(32). On the other hand, the challenging symptoms recognition and  
16  
17 treatment management of these cases can potentially lead to a sudden health deterioration or even  
18  
19 death(33). This could happen for example during hospital or ICU admissions. In the present  
20  
21 sample 75% of the deaths seen in the psychoses node had been admitted to a hospital during the  
22  
23 study period. The available information does not allow knowing whether exitus took place during  
24  
25 the admissions, neither the in-patient treatment regime. An observational USA study of >60000  
26  
27 cases claimed that psychiatric disorders are a risk factor associated to higher COVID-19  
28  
29 diagnosis; with psychosis presenting greater risk ratios versus mood and anxiety disorders. The  
30  
31 same study also reported an increased risk of first-time psychiatric disorders for survivors(34).  
32  
33 Others have suggested that antipsychotics are associated to higher death rates in COVID-19  
34  
35 cases(10). More research in this direction is required.  
36  
37  
38

39  
40 The total number of chronically consumed ATC types was an important variable among cases  
41  
42 <64.7 years of age. This variable, which could also be perceived as an indicator of the associated  
43  
44 comorbidities, stresses even more the importance that underlying pathologies may have in  
45  
46 determining the severity of the infection outcome(24).  
47  
48

49  
50 In this work a surrogate outcome variable has been used. Assuming that more intensive care levels  
51  
52 represented worse COVID-19 status is a decision also taken by previous authors(12,35–37). The  
53  
54 available data does allow studying if admissions and deaths may have been due to other health  
55  
56 problems.  
57

58  
59 The current study has certain limitations. The implemented information is based exclusively on  
60  
61 electronic health record data within the previously defined dates. After that period the severity of

1  
2  
3 certain cases may have worsen. Nonetheless, the end study date corresponds to the end of the first  
4 COVID-19 wave in our area, where new infections and deaths were very low. This, in  
5 combination with the big study sample should have minimized the effect of possible outcome  
6 variations. No COVID-19 symptoms are presented. An attempt to register these symptoms was  
7 incorporated at the Osakidetza electronic records, early on after the outbreak. But, the number of  
8 symptoms and registration format evolved over the studied period; PC and hospital registrations  
9 differed; the medical staff mostly annotated symptoms in text format; while most importantly  
10 such registration was totally missing in many cases. During analysis an effort to re-code text  
11 annotations, and homogenize information from primary care and hospital data was made. In spite  
12 of that, and due to the frequency of missing values, the representativeness of the corresponding  
13 data could not be assumed. Symptoms are probably more relevant for algorithms discriminating  
14 cases from non-cases(38). Also, most likely the present data does not include information of  
15 asymptomatic cases. During the first pandemic wave no massive testings were performed in  
16 Spain. Thus, identified cases were either symptomatic, or close contacts of infected individuals.  
17 Working with health records makes recovering missing data or refining variable information a  
18 very difficult task. This was the case with the income level. Its broad categories may have  
19 obscured a more appropriate exploration. On the other hand, the high frequency of missing  
20 income level data seen in the Exitus group, is due to the “un-subscriptions” of the dead cases from  
21 the medication dispensing registry. It is important to note that the target of the Basque public  
22 health system is a health coverage based on the health needs and not the earnings of the  
23 individuals.

24  
25  
26  
27  
28  
29  
30  
31  
32  
33  
34  
35  
36  
37  
38  
39  
40  
41  
42  
43  
44  
45  
46  
47  
48 One of the main strength of this study is its big sample size. The consideration of three outcome  
49 groups is another advantage, which allows for a better visualization of the different severity levels  
50 of the disease. Finally, implementing the CART methodology assisted in translating a complex  
51 and multifactorial reality into an easy to follow picture. Our findings make clinical sense and are  
52 supported by previous evidence. They appear to endorse the need for public health prevention  
53 plans that consider population characteristics. At the same time, they highlight that for a  
54  
55  
56  
57  
58  
59  
60



1  
2  
3 multifactorial problem to be properly treated, not only the factors affecting it, but also the inter-  
4  
5 relations between the latter should be thoroughly studied. The COVID-19 pandemic may be a  
6  
7 new starting point in the public health paradigm. The necessity for public health promoters to  
8  
9 work hand-in-hand with investigators and data analysts has become indisputable, under the  
10  
11 current circumstances. Prevention plans should be based on rigorous data and understanding of  
12  
13 the latter. This is the only way to assure that possible re-organization and estimation of future  
14  
15 resources can reach optimal results.  
16

17  
18  
19  
20 **Dissemination declaration:** Upon acceptance, the results will be disseminated to patient  
21 organizations, medical students or/and other interested groups or means of communication.  
22

23 **Data availability:** The data of the current study are stored in a server of our institution. Sharing  
24 them with external investigators will be evaluated on an individual basis and will require an  
25 approval by the Osakidetza central services. The corresponding author should be contacted.  
26

27 **Funding source:** No funding was obtained for this study.  
28

29 **Authors' Contributions:** IV, RR and MM planned this study and obtained the permission for  
30 exploring the corresponding data by the Osakidetza central services. MMA set the filters and  
31 performed the data extraction of the electronic health record data. KV and MMA are both  
32 responsible for data cleaning and recoding. KV and MMA performed all statistical analyses. The  
33 input of IV and RR have assured a clinically meaningful perspective of all presented analyses and  
34 results. MM performed literature searches. KV drafted the first manuscript version. All authors  
35 read and contributed to the consecutive manuscript versions.  
36

37 **Competing interest:** All authors have completed the ICMJE uniform disclosure form at  
38 [www.icmje.org/coi\\_disclosure.pdf](http://www.icmje.org/coi_disclosure.pdf) and declare: no support from any organisation for the  
39 submitted work; no financial relationships with any organisations that might have an interest in  
40 the submitted work in the previous three years; no other relationships or activities that could  
41 appear to have influenced the submitted work.”  
42  
43  
44  
45  
46  
47  
48  
49  
50  
51  
52  
53  
54  
55  
56  
57  
58  
59  
60

## References

1. Coronavirus Update (Live): 35,732,698 Cases and 1,046,514 Deaths from COVID-19 Virus Pandemic - Worldometer [Internet]. [cited 2020 Oct 6]. Available from: <https://www.worldometers.info/coronavirus/>
2. Docherty AB, Harrison EM, Green CA, Hardwick HE, Pius R, Norman L, et al. Features of 20 133 UK patients in hospital with covid-19 using the ISARIC WHO Clinical Characterisation Protocol: prospective observational cohort study. Available from: <https://isaric4c.net>
3. Nachtigall I, Lenga P, Józwiak K, Thürmann P, Meier-Hellmann A, Kuhlen R, et al. Clinical course and factors associated with outcomes among 1904 patients hospitalized with COVID-19 in Germany: an observational study. *Clin Microbiol Infect* [Internet]. 2020 [cited 2020 Nov 10]; Available from: <https://reader.elsevier.com/reader/sd/pii/S1198743X20304936?token=088D506A6F15F95832BA1FF82EBE9040EC1E3154088A738F47EBD33697538DEFF79877982A8A7F3857E2695415D62354>
4. Hewitt J, Carter B, Vilches-Moraga A, Quinn TJ, Braude P, Verduri A, et al. The effect of frailty on survival in patients with COVID-19 (COPE): a multicentre, European, observational cohort study. *Lancet Public Heal* [Internet]. 2020 Aug 1 [cited 2020 Nov 10];5(8):e444–51. Available from: [www.thelancet.com/](http://www.thelancet.com/)
5. Baqui P, Bica I, Marra V, Ercole A, van der Schaar M. Ethnic and regional variations in hospital mortality from COVID-19 in Brazil: a cross-sectional observational study. *Lancet Glob Heal* [Internet]. 2020 Aug 1 [cited 2020 Nov 10];8(8):e1018–26. Available from: [www.thelancet.com/lancetghVol](http://www.thelancet.com/lancetghVol)
6. Jones RC, Ho JC, Kearney H, Glibbery M, Levin DL, Kim J, et al. Evaluating Trends in

- 1  
2  
3 COVID-19 Research Activity in Early 2020: The Creation and Utilization of a Novel Open-  
4  
5 Access Database. *Cureus* [Internet]. 2020 Aug 22 [cited 2020 Nov 10];12(8). Available  
6  
7 from: <https://pubmed.ncbi.nlm.nih.gov/32968602/>  
8  
9
- 10 7. Wynants L, Van Calster B, Collins GS, Riley RD, Heinze G, Schuit E, et al. Prediction  
11  
12 models for diagnosis and prognosis of covid-19: Systematic review and critical  
13  
14 appraisal. *BMJ*. 2020;369.
- 15  
16  
17 8. Aguiar M, Ortuondo EM, Bidaurrezaga Van-Dierdonck J, Mar J, Stollenwerk N.  
18  
19 Modelling COVID 19 in the Basque Country from introduction to control measure  
20  
21 response. *Sci Rep* [Internet]. 2020 Dec 14 [cited 2020 Oct 16];10(1):17306. Available  
22  
23 from: <http://www.nature.com/articles/s41598-020-74386-1>  
24  
25  
26  
27 9. Casas-Rojo JM, Antón-Santos JM, Millán-Núñez-Cortés J, Lumbreras-Bermejo C, Ramos-  
28  
29 Rincón JM, Roy-Vallejo E, et al. Clinical characteristics of patients hospitalized with  
30  
31 COVID-19 in Spain: Results from the SEMI-COVID-19 Registry. *Rev Clin Esp*. 2020;  
32  
33  
34 10. Poblador-Plou B, Carmona-Pírez J, Ioakeim-Skoufa I, Poncel-Falcó A, Bliet-Bueno K,  
35  
36 Cano-Del Pozo M, et al. Baseline chronic comorbidity and mortality in laboratory-  
37  
38 confirmed COVID-19 cases: Results from the PRECOVID study in Spain. *Int J Environ Res*  
39  
40  
41  
42  
43  
44  
45 11. Rubio-Rivas M, Corbella X, Mora-Luján JM, Loureiro-Amigo J, López Sampalo A, Yera  
46  
47 Bergua C, et al. Predicting Clinical Outcome with Phenotypic Clusters in COVID-19  
48  
49 Pneumonia: An Analysis of 12,066 Hospitalized Patients from the Spanish Registry  
50  
51 SEMI-COVID-19. *J Clin Med*. 2020;9(11):3488.  
52  
53  
54 12. Working group for the surveillance and control of COVID-19 in Spain. The first wave of  
55  
56 the COVID-19 pandemic in Spain : characterisation of cases and risk factors for severe  
57  
58 outcomes , as at 27 April 2020. *Eurosurveillance* [Internet]. 2020;25(50):1–13. Available  
59  
60

- 1  
2  
3 from: <http://dx.doi.org/10.2807/1560-7917.ES.2020.25.50.2001431>  
4  
5  
6 13. Bengoa R. Transforming health care: an approach to system-wide implementation. *Int J*  
7  
8 *Integr Care*. 2013;13(3).  
9  
10  
11 14. Zhang H, Singer BH. *Recursive Partitioning and Applications*. Second edi. New York:  
12  
13 Springer Series in Statistics; 2010.  
14  
15  
16 15. Orueta JF, Nuño-Solinis R, Mateos M, Vergara I, Grandes G, Esnaola S. Predictive risk  
17  
18 modelling in the Spanish population: A cross-sectional study. *BMC Health Serv Res*  
19  
20 [Internet]. 2013;13(1):1. Available from: BMC Health Services Research  
21  
22  
23 16. Walker, Glenn A, 2002. *Common Statistical Methods for Clinical Research with SAS*  
24  
25 *Examples, Second Edition*. SAS Institute. Cary, NC;  
26  
27  
28 17. Wollenstein-Betech S, Cassandras CG, Paschalidis IC. Personalized Predictive Models for  
29  
30 Symptomatic COVID-19 Patients Using Basic Preconditions: Hospitalizations, Mortality,  
31  
32 and the Need for an ICU or Ventilator. *Int J Med Inform*. 2020 Aug;104258.  
33  
34  
35  
36 18. WHO Team: Social determinants of Health. *World report on ageing and health*  
37  
38 [Internet]. World Health Organization. Luxembourg; 2015 [cited 2020 Dec 9]. Available  
39  
40 from: <https://www.who.int/publications/i/item/world-report-on-ageing-and-health>  
41  
42  
43 19. Gebhard C, Regitz-Zagrosek V, Neuhauser HK, Morgan R, Klein SL. Impact of sex and  
44  
45 gender on COVID-19 outcomes in Europe. Vol. 11, *Biology of Sex Differences*. BioMed  
46  
47 Central Ltd.; 2020.  
48  
49  
50  
51 20. Rider V, Martocchia A, Cava A La, Moulton VR. Sex Hormones in Acquired Immunity and  
52  
53 Autoimmune Disease. *Front Immunol* | [www.frontiersin.org](http://www.frontiersin.org) [Internet]. 2018;9:2279.  
54  
55 Available from: [www.frontiersin.org](http://www.frontiersin.org)  
56  
57  
58 21. Dehingia N, Raj A. Sex differences in COVID-19 case fatality: do we know enough?  
59  
60

- 1  
2  
3 Lancet Glob Heal. 2020 Nov;  
4  
5  
6 22. Knight SR, Ho A, Pius R, Buchan I, Carson G, Drake TM, et al. Risk stratification of  
7  
8 patients admitted to hospital with covid-19 using the ISARIC WHO Clinical  
9  
10 Characterisation Protocol: development and validation of the 4C Mortality Score. BMJ  
11  
12 [Internet]. 2020;370:22. Available from: <http://dx.doi.org/10.1136/bmj.m3339>  
13  
14  
15 23. Mei Y, Weinberg SE, Zhao L, Frink A, Qi C, Behdad A, et al. Risk stratification of  
16  
17 hospitalized COVID-19 patients through comparative studies of laboratory results with  
18  
19 influenza. EClinicalMedicine [Internet]. 2020;26:100475. Available from:  
20  
21  
22 <https://doi.org/10.1016/j.eclinm.2020.100475>  
23  
24  
25 24. Starke KR, Petereit-Haack G, Schubert M, Kämpf D, Schliebner A, Hegewald J, et al. The  
26  
27 Age-Related Risk of Severe Outcomes Due to COVID-19 Infection: A Rapid Review,  
28  
29 Meta-Analysis, and Meta-Regression. Available from: [www.mdpi.com/journal/ijerph](http://www.mdpi.com/journal/ijerph)  
30  
31  
32 25. Koralnik IJ, Tyler KL. COVID-19: A Global Threat to the Nervous System. Ann Neurol.  
33  
34 2020;88(1):1–11.  
35  
36  
37 26. Herman C, Mayer K, Sarwal A, Org N, Covid19 /. Scoping review of prevalence of  
38  
39 neurologic comorbidities in patients hospitalized for COVID-19. 2020;  
40  
41  
42 27. Romagnolo A, Balestrino R, Imbalzano G, Ciccone G, Riccardini Franco, Carlo , et al.  
43  
44 Neurological comorbidity and severity of COVID-19. J Neurol [Internet]. 123AD;1:3.  
45  
46 Available from: <https://doi.org/10.1007/s00415-020-10123-y>  
47  
48  
49 28. Rossi R, Coppi F, Talarico M, Boriani G. Protective role of chronic treatment with direct  
50  
51 oral anticoagulants in elderly patients affected by interstitial pneumonia in COVID-19  
52  
53 era. Eur J Intern Med. 2020;77(May):158–60.  
54  
55  
56 29. Schiavone M, Gasperetti A, Mancone M, Curnis A, Mascioli G, Mitacchione G, et al. Oral  
57  
58 anticoagulation and clinical outcomes in COVID-19: An Italian multicenter experience.  
59  
60

- 1  
2  
3 Int J Cardiol. 2020;323:276–80.  
4  
5  
6 30. Hanff TC, Mohareb AM, Giri J, Cohen JB, Chirinos JA. Thrombosis in COVID-19. Am J  
7  
8 Hematol. 2020;95(12):1578–89.  
9  
10  
11 31. Vivas D, Roldán V, Esteve-Pastor MA, Roldán I, Tello-Montoliu A, Ruiz-Nodar JM, et al.  
12  
13 Recommendations on antithrombotic treatment during the COVID-19 pandemic.  
14  
15 Position statement of the Working Group on Cardiovascular Thrombosis of the Spanish  
16  
17 Society of Cardiology. Rev Esp Cardiol. 2020;73(9):749–57.  
18  
19  
20  
21 32. Oakley P, Kisely S, Baxter A, Harris M, Desoe J, Dziouba A, et al. Increased mortality  
22  
23 among people with schizophrenia and other non-affective psychotic disorders in the  
24  
25 community: A systematic review and meta-analysis. J Psychiatr Res [Internet].  
26  
27 2018;102(April):245–53. Available from:  
28  
29 <https://doi.org/10.1016/j.jpsychires.2018.04.019>  
30  
31  
32  
33 33. Simon L, Hashmi M, Callahan A. Neuroleptic Malignant Syndrome [Internet]. [Updated  
34  
35 2020 Nov 20]. In: StatPearls [Internet]. Treasure Island (FL): StatPearls Publishing; 2020  
36  
37 Jan-; Available from: <https://www.ncbi.nlm.nih.gov/books/NBK482282/>  
38  
39  
40 34. Taquet M, Luciano S, Geddes JR, Harrison PJ. Bidirectional associations between COVID-  
41  
42 19 and psychiatric disorder: retrospective cohort studies of 62 354 COVID-19 cases in  
43  
44 the USA. The Lancet Psychiatry [Internet]. 2020 [cited 2020 Dec 10]; Available from:  
45  
46 <https://doi.org/10.1016/S2215-0366>  
47  
48  
49 35. Clark A, Jit M, Warren-Gash C, Guthrie B, Wang HHX, Mercer SW, et al. Global, regional,  
50  
51 and national estimates of the population at increased risk of severe COVID-19 due to  
52  
53 underlying health conditions in 2020: a modelling study. Lancet Glob Heal. 2020 Aug  
54  
55 1;8(8):e1003–17.  
56  
57  
58  
59 36. Ghahramani S, Tabrizi R, Lankarani KB, Kashani SMA, Rezaei S, Zeidi N, et al. Laboratory  
60

1  
2  
3 features of severe vs. non-severe COVID-19 patients in Asian populations: A systematic  
4  
5 review and meta-analysis. Vol. 25, European Journal of Medical Research. BioMed  
6  
7 Central; 2020.  
8  
9

10 37. Ou M, Zhu J, Ji P, Li H, Zhong Z, Li B, et al. Risk factors of severe cases with COVID-19: a  
11  
12 meta-analysis. Epidemiol Infect. 2020 Aug 12;148:e175.  
13  
14

15 38. Zimmerman R, Nowalk MP, Bear T, Taber R, Sax T, Eng H, et al. Proposed Clinical  
16  
17 Indicators for Efficient Screening and Testing for COVID-19 Infection from Classification  
18  
19 and Regression Trees (CART) Analysis [Internet]. medRxiv : the preprint server for  
20  
21 health sciences. 2020. Available from: <https://doi.org/10.1101/2020.05.11.20097980>  
22  
23  
24  
25  
26  
27  
28  
29  
30  
31  
32  
33  
34  
35  
36  
37  
38  
39  
40  
41  
42  
43  
44  
45  
46  
47  
48  
49  
50  
51  
52  
53  
54  
55  
56  
57  
58  
59  
60

**Table 1:** Baseline information of the COVID-19 cases during the first wave of the pandemic

| Variables                           | Total (n=14197) | Primary Care (n=9722) | Hospital/ICU (n=3710) | Exitus (n=765) | p-value |
|-------------------------------------|-----------------|-----------------------|-----------------------|----------------|---------|
| <b>Age; mean (SD)</b>               | 53.7 (17.4)     | 48.0 (14.4)           | 62.8 (16.1)           | 82.3 (10.5)    | <0.0001 |
| <b>Sex</b>                          |                 |                       |                       |                |         |
| Male                                | 5520 (38.9)     | 3073 (31.6)           | 2031 (54.7)           | 416 (54.4)     | <0.0001 |
| Female                              | 8677 (61.1)     | 6649 (68.4)           | 1679 (45.3)           | 349 (45.6)     |         |
| <b>Health care complexity</b>       |                 |                       |                       |                |         |
| <i>Missing information</i>          | 405 (2.9)       | 307 (3.2)             | 86 (2.3)              | 12 (1.6)       |         |
| Prevention and promotion            | 3878 (27.3)     | 3399 (36.1)           | 470 (12.9)            | 9 (1.2)        | <0.0001 |
| Self-management support             | 6821 (48.0)     | 4989 (52.9)           | 1675 (46.2)           | 157 (20.8)     |         |
| Disease management                  | 2252 (15.9)     | 891 (9.4)             | 1050 (28.9)           | 311 (41.3)     |         |
| Case management                     | 841 (5.9)       | 136 (1.4)             | 429 (11.8)            | 276 (36.6)     |         |
| <b>Income level</b>                 |                 |                       |                       |                |         |
| <i>Missing information</i>          | 854 (6.0)       | 251 (2.6)             | 130 (3.5)             | 473 (61.8)     |         |
| <18.000 euros                       | 6536 (46.0)     | 4297 (45.3)           | 2038 (56.9)           | 201 (68.8)     | <0.0001 |
| 18.000-100.000 euros                | 6670 (47.0)     | 5074 (53.5)           | 1507 (42.0)           | 89 (30.4)      |         |
| >100.000 euros                      | 137 (1.0)       | 100 (1.0)             | 35 (0.9)              | 2 (0.6)        |         |
| <b>Flu vaccination in 2019: yes</b> |                 |                       |                       |                |         |
| All vaccinated cases                | 3336 (23.5)     | 1322 (13.6)           | 1446 (39.0)           | 568 (74.2)     | <0.0001 |
| Vaccinated cases <65 years old      | 1103 (10.1)     | 814 (9.2)             | 265 (13.6)            | 24 (42.8)      | <0.0001 |
| Vaccinated cases ≥ 65 years old     | 2233 (66.5)     | 508 (57.7)            | 1181 (66.9)           | 544 (76.7)     | <0.0001 |

Data are frequency (percentage), unless otherwise stated. For variables with missing information, percentages and statistical comparisons are based on valid data only. Presented p-values are based on one-way ANOVA for the variable of age and the chi-square test for the categorical variables. Cases <65 year and ≥ 65 years were n=10843 and n=3354, respectively. Jonckheere-Terpstra and Mantel-Haenszel chi-square test for trend also resulted in p<0.0001 in all comparisons.



**Table 2:** Chronic medication consumption of the COVID-19 sample.

|                                                                         | <b>Total<br/>(n=14197)</b> | <b>Primary Care<br/>(n=9722)</b> | <b>Hospital/ICU<br/>(n=3710)</b> | <b>Exitus<br/>(n=765)</b> | <b>p-value</b> |
|-------------------------------------------------------------------------|----------------------------|----------------------------------|----------------------------------|---------------------------|----------------|
| Medication (ATC type)                                                   |                            |                                  |                                  |                           |                |
| Alimentary tract and metabolism (A)                                     | 4685 (33.0)                | 2234 (23.0)                      | 1837 (49.5)                      | 614 (80.3)                | <0.0001        |
| Blood and blood forming organs (B)                                      | 2414 (17.0)                | 889 (9.1)                        | 1057 (28.5)                      | 468 (61.2)                | <0.0001        |
| Cardiovascular system (C)                                               | 4294 (30.2)                | 1813 (18.6)                      | 1893 (51.0)                      | 588 (76.9)                | <0.0001        |
| Dermatologicals (D)                                                     | 1765 (12.4)                | 1032 (10.6)                      | 581 (15.7)                       | 152 (19.9)                | <0.0001        |
| Genitourinary system and sex hormones (G)                               | 1690 (11.9)                | 1050 (10.8)                      | 505 (13.6)                       | 135 (17.6)                | <0.0001        |
| Systemic Hormonal preparations, excluding sex hormones and insulins (H) | 1504 (10.6)                | 876 (9.0)                        | 492 (13.3)                       | 136 (17.8)                | <0.0001        |
| Antiinfectives for systemic use (J)                                     | 223 (1.6)                  | 122 (1.3)                        | 73 (2.0)                         | 28 (3.7)                  | <0.0001        |
| Antineoplastic and immunomodulating agents (L)                          | 360 (2.5)                  | 165 (1.7)                        | 141 (3.8)                        | 54 (7.1)                  | <0.0001        |
| Musculo-Skeletal system (M)                                             | 3137 (22.1)                | 2010 (20.7)                      | 952 (25.7)                       | 175 (22.9)                | <0.0001        |
| Nervous System (N)                                                      | 5494 (38.7)                | 2906 (29.9)                      | 1931 (52.0)                      | 657 (85.9)                | <0.0001        |
| Antiparasitic products, insecticides and repellents (P)                 | 42 (0.3)                   | 24 (0.2)                         | 15 (0.4)                         | 3 (0.4)                   | 0.284          |
| Respiratory System (R)                                                  | 2603 (18.3)                | 1517 (15.6)                      | 864 (23.3)                       | 222 (29.0)                | <0.0001        |
| Sensory Organs (S)                                                      | 863 (6.1)                  | 443 (4.6)                        | 297 (8.0)                        | 123 (16.1)                | <0.0001        |
| Various (V)                                                             | 188 (1.3)                  | 45 (0.5)                         | 58 (1.6)                         | 85 (11.1)                 | <0.0001        |
| Polypharmacy: yes                                                       | 2921 (20.5)                | 935 (9.6)                        | 1357 (36.5)                      | 629 (82.2)                | <0.0001        |
| Num. ATC types consumed: median (Q1,Q3)                                 | 2 (0, 3)                   | 1 (0, 3)                         | 3 (1, 4)                         | 5 (3, 6)                  | <0.0001        |

Data are frequency (percentage), unless otherwise stated. Q1, Q3: interquartile range values. ATC: Anatomical Therapeutic Chemicals. Presented p-values are based on the Chi-square test. The Jonckheere-Terpstra and Mantel-Haenszel chi-square test for trend resulted in very similar results in all comparisons.

**Table 3: Chronic diseases of the COVID-19 cases in the three outcome groups**

| Disease                                                                            | Total<br>(n=14197) | Primary Care<br>(n=9722) | Hospital/ICU<br>(n=3710) | Exitus<br>(n=765) | p-value |
|------------------------------------------------------------------------------------|--------------------|--------------------------|--------------------------|-------------------|---------|
| <b>Infectious disease</b>                                                          |                    |                          |                          |                   |         |
| HIV infection                                                                      | 23 (0.2)           | 7 (0.1)                  | 12 (0.3)                 | 4 (0.5)           | 0.0002  |
| Liver disease and cirrhosis                                                        | 133 (0.9)          | 49 (0.5)                 | 72 (1.9)                 | 12 (1.6)          | <0.0001 |
| <b>Malignant neoplasm</b>                                                          |                    |                          |                          |                   |         |
|                                                                                    | 918 (6.4)          | 364 (3.7)                | 410 (11.0)               | 144 (18.8)        | <0.0001 |
| <b>Endocrine diseases</b>                                                          |                    |                          |                          |                   |         |
| Subclinical hypothyroidism without treatment                                       | 1101 (7.8)         | 747 (7.7)                | 294 (7.9)                | 60 (7.8)          | 0.892   |
| Diabetes Mellitus                                                                  | 1213 (8.5)         | 395 (4.1)                | 606 (16.3)               | 212 (27.7)        | <0.0001 |
| <b>Diseases of the blood and blood-forming organs</b>                              |                    |                          |                          |                   |         |
|                                                                                    | 1602 (11.3)        | 930 (9.6)                | 492 (13.3)               | 180 (23.5)        | <0.0001 |
| <b>Mental disorders</b>                                                            |                    |                          |                          |                   |         |
| Psychoses                                                                          | 412 (2.9)          | 138 (1.4)                | 143 (3.9)                | 131 (17.1)        | <0.0001 |
| Neurotic disorders, personality disorders, and other nonpsychotic mental disorders | 4258 (30.0)        | 2926 (30.1)              | 1096 (29.5)              | 236 (30.8)        | 0.712   |
| Mental retardation                                                                 | 39 (0.3)           | 24 (0.2)                 | 14 (0.4)                 | 1 (0.1)           | 0.319   |
| <b>Nervous system diseases</b>                                                     |                    |                          |                          |                   |         |
| Hereditary and degenerative diseases of the central nervous system                 | 419 (3.0)          | 145 (1.5)                | 149 (4.0)                | 125 (16.3)        | <0.0001 |
| <b>Diseases of the circulatory system</b>                                          |                    |                          |                          |                   |         |
| Hypertensive disease                                                               | 2988 (21.0)        | 1177 (12.1)              | 1364 (36.8)              | 447 (58.4)        | <0.0001 |
| Ischemic heart disease                                                             | 448 (3.2)          | 111 (1.1)                | 237 (6.4)                | 100 (13.1)        | <0.0001 |
| Cerebrovascular disease                                                            | 611 (4.3)          | 189 (1.9)                | 266 (7.2)                | 156 (20.4)        | <0.0001 |
| Heart failure & Atrial fibrillation and flutter                                    | 709 (5.0)          | 132 (1.4)                | 361 (9.7)                | 216 (28.2)        | <0.0001 |
| Acute pulmonary heart disease & other venous embolism and thrombosis               | 150 (1.1)          | 49 (0.5)                 | 73 (2.0)                 | 28 (3.7)          | <0.0001 |
| Arterial embolism and thrombosis                                                   | 39 (0.3)           | 17 (0.2)                 | 17 (0.5)                 | 5 (0.7)           | 0.002   |
| <b>Respiratory disease</b>                                                         |                    |                          |                          |                   |         |
| Chronic obstructive pulmonary disease and allied conditions                        | 1483 (10.4)        | 844 (8.7)                | 506 (13.6)               | 133 (17.4)        | <0.0001 |
| Pneumoconioses and other lung diseases due to external agents                      | 20 (0.1)           | 9 (0.1)                  | 8 (0.2)                  | 3 (0.4)           | 0.038   |
| <b>Diseases of the Digestive system</b>                                            |                    |                          |                          |                   |         |
| Diseases of esophagus, stomach and duodenum                                        | 1481 (10.4)        | 907 (9.3)                | 468 (12.6)               | 106 (13.9)        | <0.0001 |
| Non-infectious enteritis and colitis                                               | 643 (4.5)          | 500 (5.1)                | 121 (3.3)                | 22 (2.9)          | <0.0001 |
| Regional enteritis & Ulcerative Colitis                                            | 73 (0.5)           | 51 (0.5)                 | 16 (0.4)                 | 6 (0.8)           | 0.447   |
| <b>Disease of the genitourinary system</b>                                         |                    |                          |                          |                   |         |
| Chronic kidney disease                                                             | 398 (2.8)          | 87 (0.9)                 | 188 (5.1)                | 123 (16.1)        | <0.0001 |
| <b>Diseases of the skin and subcutaneous tissue</b>                                |                    |                          |                          |                   |         |
| Psoriasis                                                                          | 315 (2.2)          | 180 (1.9)                | 113 (3.0)                | 22 (2.9)          | <0.0001 |
| <b>Diseases of the musculoskeletal system and connective tissue</b>                |                    |                          |                          |                   |         |
| Systemic lupus erythematosus                                                       | 36 (0.3)           | 24 (0.2)                 | 10 (0.3)                 | 2 (0.3)           | 0.972   |
| Rheumatoid arthritis and other inflammatory polyarthropathies                      | 125 (0.9)          | 59 (0.6)                 | 55 (1.5)                 | 11 (1.4)          | <0.0001 |
| Arthropathy associated with other disorders classified elsewhere                   | 8 (0.1)            | 5 (0.1)                  | 1 (0.0)                  | 2 (0.3)           | 0.042   |
| Multimorbidity: $\geq 2$ chronic diseases                                          | 5326 (37.5)        | 2715 (27.9)              | 1975 (53.2)              | 636 (83.1)        | <0.0001 |
| Número total de enfermedades Crónicas                                              |                    |                          |                          |                   |         |
| Median (Q1, Q3)                                                                    | 1 (0, 2)           | 1 (0, 2)                 | 2 (1, 3)                 | 3 (2, 4)          | <0.0001 |

Data are frequency (percentage) unless otherwise stated; Q1, Q3: interquartile range values. Presented p-values are based on the Chi-square test. The Jonckheere-Terpstra and Mantel-Haenszel chi-square test for trend resulted in very similar results in all comparisons.

Figure 1: CART model results for the COVID-19 outcome severity.

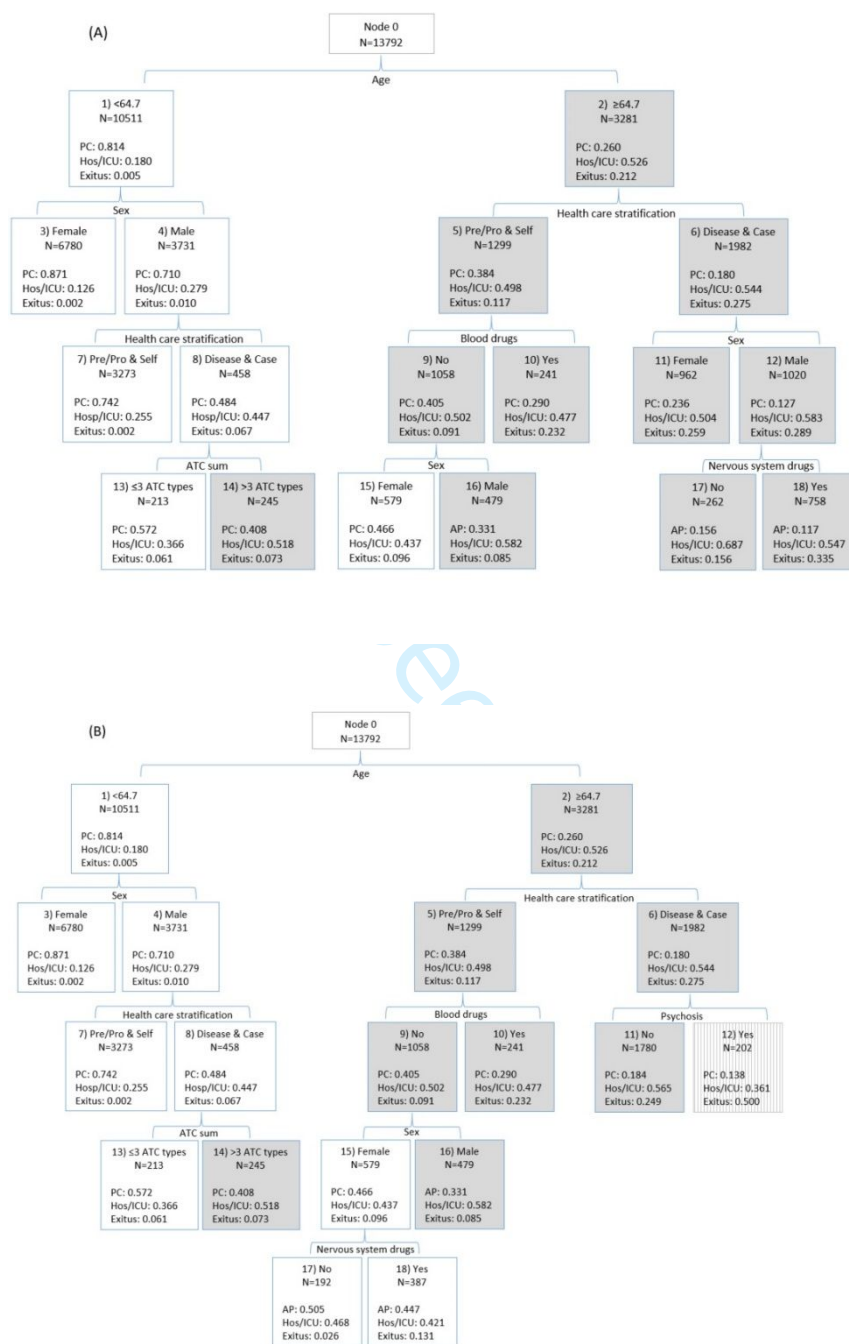

PC: primary care; Hos/ICU: hospital and intensive care unit. Percentages up to 3 decimal places are given. Due to rounding, node percentages may not add to 100%. Pre/Pro & Self: Prevention and promotion, and Self-management support. Disease & Case: Disease management and Case management. ATC: Anatomical Therapeutic Chemical. White nodes represent groups with a higher percentage of PC care. Grey nodes represent groups with a higher percentage of Hospital/ICU admission, and grey stripes nodes groups with a higher percentage of Exitus. Models excluding (A) and including psychosis (B) are presented.

STROBE Statement—checklist of items that should be included in reports of *cross-sectional studies*

|                              | Item No | Recommendation                                                                                                                                                                       | page |
|------------------------------|---------|--------------------------------------------------------------------------------------------------------------------------------------------------------------------------------------|------|
| <b>Title and abstract</b>    | 1       | (a) Indicate the study's design with a commonly used term in the title or the abstract                                                                                               | 1, 2 |
|                              |         | (b) Provide in the abstract an informative and balanced summary of what was done and what was found                                                                                  | 2    |
| <b>Introduction</b>          |         |                                                                                                                                                                                      |      |
| Background/rationale         | 2       | Explain the scientific background and rationale for the investigation being reported                                                                                                 | 3    |
| Objectives                   | 3       | State specific objectives, including any prespecified hypotheses                                                                                                                     | 3,4  |
| <b>Methods</b>               |         |                                                                                                                                                                                      |      |
| Study design                 | 4       | Present key elements of study design early in the paper                                                                                                                              | 4,5  |
| Setting                      | 5       | Describe the setting, locations, and relevant dates, including periods of recruitment, exposure, follow-up, and data collection                                                      | 4    |
| Participants                 | 6       | (a) <i>Cross-sectional study</i> —Give the eligibility criteria, and the sources and methods of selection of participants                                                            | 4,5  |
| Variables                    | 7       | Clearly define all outcomes, exposures, predictors, potential confounders, and effect modifiers. Give diagnostic criteria, if applicable                                             | 4,5  |
| Data sources/<br>measurement | 8*      | For each variable of interest, give sources of data and details of methods of assessment (measurement). Describe comparability of assessment methods if there is more than one group | 4,5  |
| Bias                         | 9       | Describe any efforts to address potential sources of bias                                                                                                                            |      |
| Study size                   | 10      | Explain how the study size was arrived at                                                                                                                                            | 4    |
| Quantitative variables       | 11      | Explain how quantitative variables were handled in the analyses. If applicable, describe which groupings were chosen and why                                                         | 4    |
| Statistical methods          | 12      | (a) Describe all statistical methods, including those used to control for confounding                                                                                                | 5, 6 |
|                              |         | (b) Describe any methods used to examine subgroups and interactions                                                                                                                  | 5, 6 |
|                              |         | (c) Explain how missing data were addressed                                                                                                                                          | 6    |
|                              |         | (d) <i>Cross-sectional study</i> —If applicable, describe analytical methods taking account of sampling strategy                                                                     | 5, 6 |
|                              |         | (e) Describe any sensitivity analyses                                                                                                                                                |      |

Continued on next page

| <b>Results</b>           |     |                                                                                                                                                                                                              | <b>page</b>       |
|--------------------------|-----|--------------------------------------------------------------------------------------------------------------------------------------------------------------------------------------------------------------|-------------------|
| Participants             | 13* | (a) Report numbers of individuals at each stage of study—eg numbers potentially eligible, examined for eligibility, confirmed eligible, included in the study, completing follow-up, and analysed            | 6                 |
|                          |     | (b) Give reasons for non-participation at each stage                                                                                                                                                         | 6                 |
|                          |     | (c) Consider use of a flow diagram                                                                                                                                                                           |                   |
| Descriptive data         | 14* | (a) Give characteristics of study participants (eg demographic, clinical, social) and information on exposures and potential confounders                                                                     | Table 1           |
|                          |     | (b) Indicate number of participants with missing data for each variable of interest                                                                                                                          | Table 1           |
| Outcome data             | 15* | Report numbers of outcome events or summary measures                                                                                                                                                         |                   |
| Main results             | 16  | (a) Give unadjusted estimates and, if applicable, confounder-adjusted estimates and their precision (eg, 95% confidence interval). Make clear which confounders were adjusted for and why they were included | 6, 8, 9, figure 1 |
|                          |     | (b) Report category boundaries when continuous variables were categorized                                                                                                                                    | 6, figure 1       |
|                          |     | (c) If relevant, consider translating estimates of relative risk into absolute risk for a meaningful time period                                                                                             |                   |
| Other analyses           | 17  | Report other analyses done—eg analyses of subgroups and interactions, and sensitivity analyses                                                                                                               | 8, 9              |
| <b>Discussion</b>        |     |                                                                                                                                                                                                              |                   |
| Key results              | 18  | Summarise key results with reference to study objectives                                                                                                                                                     | 10                |
| Limitations              | 19  | Discuss limitations of the study, taking into account sources of potential bias or imprecision. Discuss both direction and magnitude of any potential bias                                                   | 12, 13            |
| Interpretation           | 20  | Give a cautious overall interpretation of results considering objectives, limitations, multiplicity of analyses, results from similar studies, and other relevant evidence                                   | 10-12             |
| Generalisability         | 21  | Discuss the generalisability (external validity) of the study results                                                                                                                                        | 10-12             |
| <b>Other information</b> |     |                                                                                                                                                                                                              |                   |
| Funding                  | 22  | Give the source of funding and the role of the funders for the present study and, if applicable, for the original study on which the present article is based                                                | 14                |

\*Give information separately for cases and controls in case-control studies and, if applicable, for exposed and unexposed groups in cohort and cross-sectional studies.

**Note:** An Explanation and Elaboration article discusses each checklist item and gives methodological background and published examples of transparent reporting. The STROBE checklist is best used in conjunction with this article (freely available on the Web sites of PLoS Medicine at <http://www.plosmedicine.org/>, Annals of Internal Medicine at <http://www.annals.org/>, and Epidemiology at <http://www.epidem.com/>). Information on the STROBE Initiative is available at [www.strobe-statement.org](http://www.strobe-statement.org).

# BMJ Open

## Variables associated to COVID-19 severity: an observational study of non-paediatric confirmed cases from the general population of the Basque Country, Spain

|                                 |                                                                                                                                                                                                                                                                                                                                                                                                                                                                                                                                                                                                                                                                                                                                                                                                                                                                                                                                                                                 |
|---------------------------------|---------------------------------------------------------------------------------------------------------------------------------------------------------------------------------------------------------------------------------------------------------------------------------------------------------------------------------------------------------------------------------------------------------------------------------------------------------------------------------------------------------------------------------------------------------------------------------------------------------------------------------------------------------------------------------------------------------------------------------------------------------------------------------------------------------------------------------------------------------------------------------------------------------------------------------------------------------------------------------|
| Journal:                        | <i>BMJ Open</i>                                                                                                                                                                                                                                                                                                                                                                                                                                                                                                                                                                                                                                                                                                                                                                                                                                                                                                                                                                 |
| Manuscript ID                   | bmjopen-2021-049066.R1                                                                                                                                                                                                                                                                                                                                                                                                                                                                                                                                                                                                                                                                                                                                                                                                                                                                                                                                                          |
| Article Type:                   | Original research                                                                                                                                                                                                                                                                                                                                                                                                                                                                                                                                                                                                                                                                                                                                                                                                                                                                                                                                                               |
| Date Submitted by the Author:   | 04-Mar-2021                                                                                                                                                                                                                                                                                                                                                                                                                                                                                                                                                                                                                                                                                                                                                                                                                                                                                                                                                                     |
| Complete List of Authors:       | Vrotsou, Kalliopi; Biodonostia Instituto de Investigación Sanitaria, Grupo de Atención Primaria; Red de Investigación en Servicios de Salud en Enfermedades Crónicas (REDISSEC); Instituto de Investigación en Servicios de Salud Kronikgune Rotaèche, Rafael; Osakidetza-Basque Health Service, Centro de Salud de Alza Mateo-Abad, Maider; Red de Investigación en Servicios de Salud en Enfermedades Crónicas (REDISSEC); ; Instituto de Investigación en Servicios de Salud Kronikgune Machón, Mónica; Biodonostia Instituto de Investigación Sanitaria, Grupo de Atención Primaria; Red de Investigación en Servicios de Salud en Enfermedades Crónicas (REDISSEC); Instituto de Investigación en Servicios de Salud Kronikgune Vergara, Itziar; Biodonostia Instituto de Investigación Sanitaria, Grupo de Atención Primaria; Red de Investigación en Servicios de Salud en Enfermedades Crónicas (REDISSEC); Instituto de Investigación en Servicios de Salud Kronikgune |
| <b>Primary Subject Heading</b>: | Epidemiology                                                                                                                                                                                                                                                                                                                                                                                                                                                                                                                                                                                                                                                                                                                                                                                                                                                                                                                                                                    |
| Secondary Subject Heading:      | Global health, Health policy, Infectious diseases, Public health                                                                                                                                                                                                                                                                                                                                                                                                                                                                                                                                                                                                                                                                                                                                                                                                                                                                                                                |
| Keywords:                       | COVID-19, Public health < INFECTIOUS DISEASES, STATISTICS & RESEARCH METHODS                                                                                                                                                                                                                                                                                                                                                                                                                                                                                                                                                                                                                                                                                                                                                                                                                                                                                                    |
|                                 |                                                                                                                                                                                                                                                                                                                                                                                                                                                                                                                                                                                                                                                                                                                                                                                                                                                                                                                                                                                 |

SCHOLARONE™  
Manuscripts



I, the Submitting Author has the right to grant and does grant on behalf of all authors of the Work (as defined in the below author licence), an exclusive licence and/or a non-exclusive licence for contributions from authors who are: i) UK Crown employees; ii) where BMJ has agreed a CC-BY licence shall apply, and/or iii) in accordance with the terms applicable for US Federal Government officers or employees acting as part of their official duties; on a worldwide, perpetual, irrevocable, royalty-free basis to BMJ Publishing Group Ltd ("BMJ") its licensees and where the relevant Journal is co-owned by BMJ to the co-owners of the Journal, to publish the Work in this journal and any other BMJ products and to exploit all rights, as set out in our [licence](#).

The Submitting Author accepts and understands that any supply made under these terms is made by BMJ to the Submitting Author unless you are acting as an employee on behalf of your employer or a postgraduate student of an affiliated institution which is paying any applicable article publishing charge ("APC") for Open Access articles. Where the Submitting Author wishes to make the Work available on an Open Access basis (and intends to pay the relevant APC), the terms of reuse of such Open Access shall be governed by a Creative Commons licence – details of these licences and which [Creative Commons](#) licence will apply to this Work are set out in our licence referred to above.

Other than as permitted in any relevant BMJ Author's Self Archiving Policies, I confirm this Work has not been accepted for publication elsewhere, is not being considered for publication elsewhere and does not duplicate material already published. I confirm all authors consent to publication of this Work and authorise the granting of this licence.

**Title page:****Title:**

**Variables associated to COVID-19 severity: an observational study of non-paediatric confirmed cases from the general population of the Basque Country, Spain.**

**Authors:**

Kalliopi Vrotsou (0000-0002-3296-3923)<sup>1,2,3</sup>, Rafael Rotaeché (0000-0001-5594-3768)<sup>1,2,4</sup>, Maider Mateo-Abad (0000-0003-2541-8166)<sup>2,3</sup>, Mónica Machón (0000-0001-6379-0351)<sup>1,2,3</sup>, Itziar Vergara (0000-0001-9671-7898)<sup>1,2,3</sup>

**Addresses:**

1. Instituto de Investigación Sanitaria Biodonostia, Grupo de Atención Primaria, San Sebastián, Spain.
2. Red de Investigación en Servicios de Salud en Enfermedades Crónicas (REDISSEC), Baracaldo, Spain.
3. Instituto de Investigación en Servicios de Salud Kronikgune, Baracaldo, Spain.
4. Osakidetza, Centro de Salud de Alza, San Sebastián, Spain

**Authors' position:**

Kalliopi Vrotsou: biostatistician.  
Rafael Rotaeché: general practitioner.  
Maider Mateo-Abad: biostatistician.  
Monica Machón: investigator  
Itziar Vergara: director of the Grupo de Atención Primaria, IIS Biodonostia

**Corresponding author:** Kalliopi Vrotsou,  
Address: IIS Biodonostia, Paseo Dr. Beguiristain 20014, San Sebastián Spain,  
Telephone number: +34 943006086  
e-mail: KALLIOPI.VROTSOUKANARI@osakidetza.eus

The Corresponding Author has the right to grant on behalf of all authors and does grant on behalf of all authors, a worldwide licence to the Publishers and its licensees in perpetuity, in all forms, formats and media (whether known now or created in the future), to i) publish, reproduce, distribute, display and store the Contribution, ii) translate the Contribution into other languages, create adaptations, reprints, include within collections and create summaries, extracts and/or, abstracts of the Contribution, iii) create any other derivative work(s) based on the Contribution, iv) to exploit all subsidiary rights in the Contribution, v) the inclusion of electronic links from the Contribution to third party material where-ever it may be located; and, vi) licence any third party to do any or all of the above.



1  
2  
3  
4  
5  
6  
7  
8  
9  
10  
11  
12  
13  
14  
15  
16  
17  
18  
19  
20  
21  
22  
23  
24  
25  
26  
27  
28  
29  
30  
31  
32  
33  
34  
35  
36  
37  
38  
39  
40  
41  
42  
43  
44  
45  
46  
47  
48  
49  
50  
51  
52  
53  
54  
55  
56  
57  
58  
59  
601  
2  
3  
4  
5  
6  
7  
8  
9  
10  
11  
12  
13  
14  
15  
16  
17  
18  
19  
20  
21  
22  
23  
24  
25  
26  
27  
28  
29  
30  
31  
32  
33  
34  
35  
36  
37  
38  
39  
40  
41  
42  
43  
44  
45  
46  
47  
48  
49  
50  
51  
52  
53  
54  
55  
56  
57  
58  
59  
60

## Abstract

**Objectives:** To investigate which were the most relevant sociodemographic and clinical variables associated to COVID-19 severity, and uncover how their inter-relations may have affected such severity.

**Design:** A retrospective observational study based on electronic health record data.

**Participants:** Individuals  $\geq 14$  years old with a positive PCR or serology test, between the 28th of February and 31<sup>st</sup> of May 2020, belonging to the Basque Country (Spain) public health system. Institutionalised and individuals admitted to a Hospital at Home unit were excluded from the study.

**Main outcome measure:** Three severity categories were established, primary care, hospital/ICU admission and death.

**Results:** A total of  $n=14197$  cases fulfilled the inclusion criteria. Most variables presented statistically significant associations with the outcome ( $p<0.0001$ ). The CART recursive partitioning methodology (based on  $n=13792$ ) suggested that among all associations, those with, age, sex, stratification of patient health care complexity, chronic consumption of blood and blood forming organ, and nervous system drugs, as well as the total number of chronic ATC types were the most relevant. Psychosis also emerged as a potential factor.

**Conclusions:** Older cases are more likely to experience more severe outcomes. However, the sex, underlying health status and chronic drug consumption may interfere and alter the aging effect. Understanding the factors related to the outcome severity is of key importance when designing and promoting public health intervention plans for the COVID-19 pandemic.

### Strengths and limitations of this study

- Over 13000 confirmed COVID-19, non institutionalised,  $\geq 14$  years old cases were explored
- Electronic health records data were a valuable source of information in this study
- The three-category outcome severity: primary care only, hospitalized/ICU care, and death was studied in a joint manner
- The CART methodology allowed exploring the big sample and the numerous variables of interest in a flexible way
- Information on COVID-19 symptoms was not properly registered during the first pandemic wave

## 1 Introduction

2 In December 2019 the new coronavirus SARS-Cov-2 initiated the COVID-19 disease in China,  
3 which soon afterwards, on March 12, was declared a pandemic by the World Health Organization  
4 (WHO). The rapid expansion of the virus, along with its high death toll and the serious health  
5 aftermaths, have rendered the COVID-19 outbreak as one of the worst health crises in almost a  
6 century worldwide.

7 Since the first infections were detected in Spain the statistics have situated this country among  
8 the most affected in Europe, both in terms of total cases and in deaths per million people (1).  
9 International literature on COVID-19 is rapidly growing (2–7). The research conducted so far in  
10 Spain, has focused mainly on predicting the evolution of the pandemic (8), or the factors  
11 associated to mortality (9). Hospitalised individuals have also been described (10), and the  
12 variables related to severe outcomes in these populations have been explored (11,12). But so far,  
13 none of the previous works has considered the gradient of the COVID-19 severity by studying a  
14 multiple category outcome.

15 The autonomous community of the Basque Country, situated in the North of Spain, has its own  
16 public health system (Osakidetza), which offers sanitary coverage to some 2.3 million people.  
17 Since 2009 Osakidetza has promoted an integrated health care model, by coordinating its different  
18 care levels and offering a more holistic approach on patient care (13). It counts with an extensive  
19 electronic health records infrastructure, where information on patient health data and episodes of  
20 care are stored. The objective of the present observational study was to describe a big series of  
21 COVID-19 infected individuals during the first pandemic wave; establish their infection severity  
22 level, based on electronic health record data, and explore what characteristics may be associated  
23 to that severity. To this end, the Classification and Regression Trees (CART) methodology was  
24 applied. This statistical technique splits the sample into mutually exclusive sub-groups that share  
25 the same characteristics and can be particularly useful when analysing big data sets (14).

26

## 1 **Methods**

### 2 *Data source and variables*

3 All information was extracted from the electronic health records of the Basque Country Public  
4 Health System-Osakidetza, via the Osakidetza Business Intelligence (OBI) tools. Data extraction  
5 covered the period between 28<sup>th</sup> February 2020 and 31<sup>st</sup> May 2020; corresponding to the first  
6 detected case in the Basque Country and the end of the first pandemic wave in Spain. Only the  
7 health records of individuals  $\geq 14$  years old with a COVID-19 positive Polymerase Chain Reaction  
8 (PCR) or antibody test, were included, as no antigen tests were performed at that time. Data of  
9 cases living in residential homes or those admitted to a hospital at home unit were excluded.

10 The following variables were studied. Age, sex and income level derived by the pharmaceutical  
11 co-payment scheme (<18,000€, 18,000-100,000€, >100,000€). Chronic medication consumption  
12 was explored using the Anatomical Therapeutic Chemical (ATC) system at the first level  
13 (<https://www.who.int/tools/atc-ddd-toolkit>). Polypharmacy, defined as the consumption of 5 or  
14 more chronic drugs, and the number of ATC types consumed were derived. Chronic pathologies  
15 based onto the International Classification of Diseases ICD-9 codes, COVID-19 symptoms  
16 registered during consultations and flu vaccination in the year 2019 were also considered. The  
17 Osakidetza stratification according to patient health care complexity was studied. Based on a  
18 series of health data, and the use of health services during the previous year, this variable classifies  
19 individuals into four categories, ranging from less to more severe: prevention and promotion of  
20 healthy population, self-management support, disease management, and case management.  
21 Pluripathological individuals belong to the last category. This classification is renewed at the  
22 beginning of every calendar year, for all individuals  $\geq 14$ -years registered in the Osakidetza system  
23 at least during the previous 6 months. A detailed description can be found elsewhere (15).

24 Given that the data were anonymous and clinical analyses could not be conducted, it was assumed  
25 that the severity of a case would be indicated by the most demanding level of medical attention  
26 received, within the study period. Four severity levels were initially identified: primary care

1 attention only (PC), hospitalisation without intensive care unit admission (Hospital), intensive  
2 care unit admission (ICU), and death. During the pandemic, several emergency ICU units were  
3 set-up within hospitals across the Basque Country. Nevertheless, this information was not  
4 reflected in the electronic health records. As a result, cases admitted to such ICUs were registered  
5 as hospital admissions. This fact imposed the necessity to merge Hospital and ICU admissions  
6 into one category in the current work. Cases meeting the inclusion criteria were considered only  
7 once in the current analyses. The project has been approved by the ethics committee CEIm de  
8 Euskadi at 22/07/2020 (reference code: PI2020087).

### 9 ***Patient and public involvement***

10 Due to the study design, no patient and public involvement was considered. Nonetheless, two of  
11 the authors are medical doctors, which has offered valuable support during this work.

### 12 ***Statistical analysis***

13 Continuous variables are presented as means with standard deviations (SD), while medians and  
14 interquartile ranges (Q1, Q3) are given for discrete variables. Categorical variables are presented  
15 with frequencies and percentages (%). Three-group unadjusted comparisons were performed with  
16 the one-way ANOVA, Kruskal-Wallis and chi-square test, respectively. The Jonckheere-Terpstra  
17 and Mantel-Haenszel chi-square, both testing for a trend along the three severity groups were  
18 additionally tested (16).

### 19 ***CART***

20 The CART methodology is a non-parametric statistical tool, which can be very useful when  
21 handling big data sets with many variables. This statistical technique partitions the sample into  
22 smaller homogenous groups that share the same characteristics. The splitting process starts  
23 considering the whole sample that is then recursively partitioned into mutually exclusive sub-  
24 samples according to the most important variables, selected among all candidate variables.  
25 Important variables in CART are those that minimize the variability of the outcome within each  
26 sub-sample. This process results in a tree-like structure with multiple levels, which offers a visual

1 representation of which variables affect the outcome the most. At the same time, it allows  
2 understanding the inter-relations the indicated factors may have with one another. CART analysis  
3 is a flexible option for data sets with correlated variables, as in our case. (14,17).

4 The starting point of the tree structure is the root node and each split is an offspring node.  
5 Offsprings that do not split any further are called terminal. In the current analyses splitting was  
6 based on the entropy criterion and each variable was allowed only once per tree branch. For a  
7 stopping rule, the number of terminal nodes, and the observations included in each of them were  
8 considered. A tree with 10 terminal nodes, each including at least 1% of the valid sample data  
9 was selected. Cost-complexity pruning was applied. Variables with significance levels  $p > 0.010$   
10 in the three-group comparisons and those with a total frequency  $< 1\%$  of the valid sample were  
11 excluded from the CART stage, while missing data were omitted (14). Analyses were performed  
12 with the SAS software version 9.4 (Copyright (c) 2016 by SAS Institute Inc., Cary, NC, USA.).  
13 The SAS proc hpsplit function was used for tree construction.

## 14 **Results**

15 A total of  $n=14197$  COVID-19 cases fulfilled the inclusion criteria. Of  $n=9722$  (68.5%) received  
16 PC attention only,  $n=3710$  (26.1%) had a hospital or ICU admission ( $n=3630$  and 80,  
17 respectively), and  $n=765$  died (5.4%). Most cases were detected via PCR ( $n=8933$ ), and this  
18 detection method was the most prevalent in all three outcome groups (PC: 51.0%, Hospital/ICU:  
19 87.7%, Death: 93.3%). Table 1 presents the baseline information of the sample. Overall, mean  
20 age was 53.7 (SD:17.4) years, and it increased with outcome severity. Most infected cases were  
21 females, but at the same time this sex group presented lower infection severity. In particular  
22 females were more prevalent in PC (68.4%), whereas more males were observed in the  
23 Hospital/ICU and Death groups. As far as the health care complexity stratification variable was  
24 concerned, the PC outcome group presented the highest percentage of healthy individuals  
25 (36.1%), while case management was most prevalent in the Death outcome group (36.6%). Based  
26 on the available information, individuals with an annual income  $< 18.000$  euros were more  
27 prevalent in the Hospital/ICU and Death groups, and those with higher income received mostly

1  
2  
3 1 PC attention. Finally, the Death group had the highest percentage of individuals with a flu  
4  
5 2 vaccination in the previous year. This observation was consistent for cases  $<65$  and  $\geq 65$  years of  
6  
7 3 age, even though the corresponding percentages of the older cases were higher. All comparisons  
8  
9 4 were statistically significant.  
10

11  
12 5  
13  
14 6 Chronic medication consumption data are presented in **Table 2**. Overall, the most consumed  
15  
16 7 medications were those for the nervous system (38.7%), alimentary tract and metabolism (33.0%),  
17  
18 8 and cardiovascular system (30.2%). With the exception of musculo-skeletal system and  
19  
20 9 antiparasitic products, insecticides and repellents, the same trend was observed in all other ATC  
21  
22 10 types. The consumption of alimentary tract and metabolism disorders (A), blood and blood  
23  
24 11 forming organs (B), cardiovascular system (C), and nervous system diseases drugs (N) exceeded  
25  
26 12 60% in the Death group. Both polypharmacy and the number of ATC types consumed was  
27  
28 13 associated with infection severity.  
29

30  
31 14  
32  
33 15 Regarding the chronic diseases, the most prevalent condition was related to mental pathologies  
34  
35 16 (**Table 3**). In particular, 30% of the sample had received a diagnosis corresponding to the ICD-9  
36  
37 17 neurotic, personality or other nonpsychotic mental disorder. Hypertension was the next more  
38  
39 18 prevalent condition (21%), followed by diseases of the blood and blood forming organs (11.5%),  
40  
41 19 diseases of the esophagus, stomach and duodenum (10.4%). Diabetes mellitus was present in  
42  
43 20 8.5% of the sample. With the exception of neurotic, personality or other nonpsychotic conditions,  
44  
45 21 that presented the same distribution along the three outcome groups, the prevalence of the most  
46  
47 22 frequent pathologies increased with COVID-19 severity. A similar trend was seen in the total  
48  
49 23 number of chronic diseases. Non-infectious enteritis and colitis, and allergic asthma were the only  
50  
51 24 chronic conditions presenting a descending prevalence with outcome severity, but percentage  
52  
53 25 differences were low.  
54  
55

56  
57 26  
58  
59  
60

## 1 **CART**

2 The CART process indicated that age, sex, health care complexity stratification, the ATC  
3 categories of blood and blood forming organ medication (B), as well as nervous system drugs (N)  
4 along with the frequency of ATC types consumed would be the most relevant variables in  
5 understanding the main case characteristics associated to the outcome. During this process the  
6 variable of psychoses was also flagged as important. In spite of its low prevalence (2.9%)  
7 psychoses was given a lot of weight in the older section of the population. The inclusion of this  
8 pathology resulted in a less parsimonious model; with ATC-N drugs placed in an additional tree  
9 level. Nonetheless, given that psychoses was the single variable resulting in a node with a death  
10 majority, and that other authors have already suggested an association between antipsychotic  
11 drugs and mortality in COVID-19 cases (9), presenting the corresponding findings was  
12 considered of relevance. Therefore, the CART process was repeated twice, first excluding and  
13 afterwards including psychoses.

### 14 *Excluding psychoses*

15 The tree generated by the CART process is depicted in Figure 1. Most cases <64.7 years of age  
16 (81.4%, node 1) received mainly PC attention. In this tree branch, males presented 15.3% more  
17 Hospital/ICU compared to females. Among males, those with worse health (node 8) had 19.2%  
18 more Hospital/ICU admissions, compared to the rest (node 7). The majority of males with worse  
19 baseline health status who consumed  $\geq 3$  ATC types experienced a Hospital/ICU admission.

20 Cases  $\geq 64.7$  years of age had mainly a Hospital/ICU outcome (52.6%), with a considerable Death  
21 prevalence (21.2%). Those with worse baseline health (node 6) had 4.6% more Hospital/ICU  
22 admissions and 15.8% more Deaths, compared to the rest. Cases with better baseline health status  
23 (node 5) were further split according to ATC-B consumption. Death for blood and blood forming  
24 organ drugs consumers was experienced in 23.2% of the cases, with the same outcome being  
25 9.1% in non-consumers. Within this last group (node 9) the majority of females received PC  
26

1 attention, while Hospital/ICU was the most prevalent outcome in males. In a similar way, among  
2 node 6 cases, males presented worse evolution than females. Finally, males consuming chronic  
3 medications for the nervous system (node 18) had 17.9% more Deaths compared to non-  
4 consumers. The 10 terminal nodes can easily be ordered less severe (i.e. <64.7 year old females,  
5 node 3) to most severe outcomes groups (i.e.  $\geq 64.7$  year old disease and case management males  
6 who consume nervous system drugs, node 10).

7

### 8 *Including psychoses*

9 The resulting CART model when the variable of psychoses was included in the recursive process  
10 is presented in Figure 2. Psychoses, was one of the main variables of this model, and the single  
11 split variable for node 6. Inclusion of this pathology added one more level to the CART tree, with  
12 chronic nervous system drugs being a split variable for node 15. Cases with psychoses had a 50%  
13 Death. The ATC-N consumers presented less PC and higher Death compared to non-consumers.  
14 No other changes were observed compared to the Figure 1A model. In this case the most severe  
15 outcome group was  $\geq 64.7$  year old disease and case management cases with psychosis (node 12).

16

17

18

19

20

21

22



## 1 Discussion

2 The present work has studied the sociodemographic and clinical characteristics of a big number  
3 of Spanish COVID-19 cases of the first pandemic wave. According to the information extracted  
4 from electronic health record data, the variables of age, sex, previous pathologies and chronic  
5 drug consumption may be decisive in understanding infection severity.

6 Both age and male sex have been flagged as important risk factors by previous COVID-19  
7 research (2,3,7,9,11,12,18). The importance of age is probably undisputable, given the  
8 deterioration of the body's immunity mechanisms and the loss of its capacity to adapt to the  
9 environment (19). The present data appears to reflect this known aging effect. In relation to the  
10 variable of sex, females presented consistently higher PC and lower Hospital/ICU in the splits  
11 where sex was present. Data from various countries are suggesting that females have better  
12 COVID-19 infection outcomes than males (7,20). Females are considered to have stronger  
13 immunity systems (21). Even though the exact mechanisms responsible for these differences in  
14 the COVID-19 context are still unclear and probably multifactorial (20); certain works are  
15 hypothesizing that low androgens levels can have a protective role against this disease (22). The  
16 current data, in conjunction with previous evidence call for a better understanding of the role of  
17 sex, in the current pandemic. Sex-specific analyses of future wave data should be planned. But  
18 more importantly, high quality prospective studies collecting sex-disaggregated data are needed  
19 (23).

20 The health care complexity stratification variable was present in both main tree arms. It should  
21 be mentioned that the way CART divided this 4-category variable into a binary one, by merging  
22 the two less severe vs. the two more severe groups was imposed by the data, not the investigators.  
23 Worse health status at the time of the infection, was associated to more hospitalizations for  
24 younger cases, and mainly to more deaths among older individuals. The inclusion of this  
25 stratification variable in the CART model is a relevant finding. Tools that stratify the general  
26 population, identifying those at greater risk, can be an asset for public health prevention programs.  
27 In the COVID-19 literature, the stratification approach has so far mainly focused on hospitalized

1 patients (12,24,25). While one meta-analysis of in-hospital cases claimed that in COVID-19  
2 infections underlying health conditions are even more important than age(26). Our data suggest  
3 that, at least at the local level, this very stratification variable can offer valuable information and  
4 its implementation may worth be considered when setting up public health action plans. Study of  
5 similar indicators used in other health systems would be encouraged.

6 As far as the drug consumption was concerned, chronic blood and blood forming organ drugs (B)  
7 and drugs for the nervous system (N), both appeared as important variables for cases  $\geq 64.7$  years  
8 of age. Cases consuming those drugs presented higher severity levels. ATC-N was the most  
9 frequent medication across all three outcome groups. ATC-B had the steepest raising in  
10 consumption from one severity level to the next. Several neurological manifestations after a  
11 COVID-19 infection have been described in the literature, with the virus perceived by certain  
12 authors as a threat for the whole nervous system (27). It is probable that individuals already  
13 suffering by chronic neurological conditions may be indeed more likely to present worse  
14 outcomes once infected (28,29). Blood related parameters like systolic and diastolic pressure, red  
15 and white cell counts, platelets, lymphocytes, among others, have been highlighted as significant  
16 predictors in different COVID-19 diagnostic models (7). An association between certain ATC-B  
17 drugs and higher odds of death in infected cases has also been observed(9). Chronic  
18 anticoagulation treatment, is referenced as protective against COVID-19 mortality by some (30),  
19 and ineffective by others (31). COVID-19 cases present a high frequency of thrombotic events,  
20 which is leading to an expansion of anticoagulation drug use when treating the disease (32). But  
21 in patients already receiving such drugs prior to infection, drug-drug interactions and infection  
22 severity should be carefully assessed before any antiviral therapy is given, or switching from oral  
23 to parenteral antithrombotic administration (33). Worse severity seen among ATC-B consumers  
24 in the current data may reflect also an increased risk for patients already under anticoagulation  
25 therapy. Poor outcomes due to therapeutic decisions and drug-drug interactions cannot be  
26 excluded either. Our continuing COVID-19 work will refine future data explorations. Obtaining

1  
2  
3  
4  
5  
6  
7  
8  
9  
10  
11  
12  
13  
14  
15  
16  
17  
18  
19  
20  
21  
22  
23  
24  
25  
26  
27  
28  
29  
30  
31  
32  
33  
34  
35  
36  
37  
38  
39  
40  
41  
42  
43  
44  
45  
46  
47  
48  
49  
50  
51  
52  
53  
54  
55  
56  
57  
58  
59  
60

1 for example ATC data at the second or third level, as well as information of in-patient treatments  
2 will offer more insight into these associations.

3 Psychoses was a relevant variable in the CART process. Antipsychotic drugs belong to the ATC-  
4 N medication type; which is probably why allowing for the inclusion of psychoses relocated this  
5 drug group further down in the tree structure. Older patients with worse baseline health and  
6 psychoses had the highest death rate among all CART nodes. We can only hypothesize over the  
7 mechanisms that could explain such a finding. On one hand, individuals with psychotic disorders  
8 present excess mortality compared to the general population, mainly due to lifestyle choices,  
9 associated comorbidities and medication side effects (34). On the other hand, the treatment  
10 management of these cases is challenging as alteration or abrupt cessation of their current  
11 medication could potentially lead to a sudden health deterioration or even death (35). This could  
12 happen for example during hospital and ICU admissions. In the present sample 75% of the deaths  
13 seen in the psychoses node had been admitted to a hospital during the study period. The available  
14 information does not allow knowing whether death took place during the admissions, neither the  
15 in-patient treatment regime. An observational USA study of >60000 cases claimed that  
16 psychiatric disorders are a risk factor associated to higher COVID-19 diagnosis; with psychosis  
17 presenting greater risk ratios versus mood and anxiety disorders. The same study also reported an  
18 increased risk of first-time psychiatric disorders for survivors (36). Others have suggested that  
19 antipsychotics use (9) and schizophrenia spectrum disorders (37) are associated with higher  
20 COVID-19 mortality. Even though more research in this direction is required, the available data  
21 seem to highlight the need for a close monitoring of cases with psychiatric disorders.

22 The total number of chronically consumed ATC types was an important variable among cases  
23 <64.7 years of age. This variable, which could also be perceived as an indicator of the associated  
24 comorbidities, stresses even more the importance that underlying pathologies may have in  
25 determining the severity of the infection outcome (26).

26 In this work, a surrogate outcome variable has been used. Assuming that more intensive care  
27 levels represented worse COVID-19 status is a decision also taken by previous authors (11,38–

1  
2  
3 40). The available data does not allow studying if admissions and deaths may have been due to  
4  
5 2 other health problems. The female prevalence of this sample was greater than that seen in other  
6  
7 3 COVID-19 publications (3,4,7), but nonetheless similar to previous studies performed in this  
8  
9 4 country (9,11). In the Spanish reality, women traditionally assume the caretaker's role for younger  
10  
11 5 and older members of their families, while they also occupy more home-assisting jobs (41) and  
12  
13 6 health related professions (42). All these conditions may imply higher exposure rates to the virus,  
14  
15 7 which may offer a possible explanation for the sample's sex distribution.  
16  
17

18 8 The current study has certain limitations. The implemented information is based exclusively on  
19  
20 9 electronic health record data within the previously defined dates. After that period the severity of  
21  
22 10 certain cases may have worsen. Nonetheless, the end study date corresponds to the end of the first  
23  
24 11 COVID-19 wave in our area, where new infections and deaths were very low. This, in  
25  
26 12 combination with the big study sample should have minimized the effect of possible outcome  
27  
28 13 variations. No COVID-19 symptoms are presented. An attempt to register these symptoms was  
29  
30 14 incorporated at the Osakidetza electronic records, early on after the outbreak. But, the number of  
31  
32 15 symptoms and registration format evolved over the studied period; PC and hospital registrations  
33  
34 16 differed; the medical staff mostly annotated symptoms in text format; while most importantly  
35  
36 17 such registration was totally missing in many cases. During analysis an effort to re-code text  
37  
38 18 annotations, and homogenize information from primary care and hospital data was made. In spite  
39  
40 19 of that, and due to the frequency of missing values, the representativeness of the corresponding  
41  
42 20 data could not be assumed. Symptoms are probably more relevant for algorithms discriminating  
43  
44 21 cases from non-cases (43). During the first pandemic wave no massive population testings were  
45  
46 22 performed in Spain, but at the end of that wave serology tests were administered to the health  
47  
48 23 professionals and allied services of our geographic area. Thus, identified cases were either  
49  
50 24 symptomatic, close contacts of cases, or individuals working in the health sector. However, the  
51  
52 25 profession of the cases was not an available piece of information in this sample. Working with  
53  
54 26 health records makes recovering missing data or refining variable information a very difficult  
55  
56 27 task. This was also the case with the income level. Its broad categories may have obscured a more  
57  
58  
59  
60

1 appropriate exploration. On the other hand, the high frequency of missing income level data seen  
2 in the Death group, is due to the “un-subscriptions” of the dead cases from the medication  
3 dispensing registry. It is important to note that the target of the Basque public health system is a  
4 health coverage based on the health needs and not the earnings of the individuals.

5 One of the main strength of this study is its big sample size. The consideration of three outcome  
6 groups is another advantage, which allows for a better visualization of the different severity levels  
7 of the disease. Finally, implementing the CART methodology assisted in translating a complex  
8 and multifactorial reality into an easy to follow picture. Our findings make clinical sense and are  
9 supported by previous evidence. They appear to endorse the need for public health prevention  
10 plans that consider population characteristics. At the same time, they highlight that for a  
11 multifactorial problem to be properly treated, not only the factors affecting it, but also the inter-  
12 relations between the latter should be thoroughly studied. The COVID-19 pandemic may be a  
13 new starting point in the public health paradigm. The necessity for public health promoters to  
14 work hand-in-hand with investigators and data analysts has become indisputable, under the  
15 current circumstances. Prevention plans should be based on rigorous data and understanding of  
16 the latter. This is the only way to assure that possible re-organization and estimation of future  
17 resources can reach optimal results.

18  
**Dissemination declaration:** Upon acceptance, the results will be disseminated to patient organizations, medical students or/and other interested groups or means of communication.

**Data availability:** The data of the current study are stored in a server of our institution. Sharing them with external investigators will be evaluated on an individual basis and will require an approval by the Osakidetza central services. The corresponding author should be contacted.

**Funding source:** No funding was obtained for this study.

**Authors' Contributions:** IV, RR and MM planned this study and obtained the permission for exploring the corresponding data by the Osakidetza central services. MMA set the filters and performed the data extraction of the electronic health record data. KV and MMA are both responsible for data cleaning and recoding. KV and MMA performed all statistical analyses. The input of IV and RR have assured a clinically meaningful perspective of all presented analyses and results. MM performed literature searches. KV drafted the first manuscript version. All authors read and contributed to the consecutive manuscript versions.

1  
2  
3 **Competing interest:** All authors have completed the ICMJE uniform disclosure form at  
4 [www.icmje.org/coi\\_disclosure.pdf](http://www.icmje.org/coi_disclosure.pdf) and declare: no support from any organisation for the  
5 submitted work; no financial relationships with any organisations that might have an interest in  
6 the submitted work in the previous three years; no other relationships or activities that could  
7 appear to have influenced the submitted work.”  
8  
9  
10  
11  
12  
13  
14  
15  
16  
17  
18  
19  
20  
21  
22  
23  
24  
25  
26  
27  
28  
29  
30  
31  
32  
33  
34  
35  
36  
37  
38  
39  
40  
41  
42  
43  
44  
45  
46  
47  
48  
49  
50  
51  
52  
53  
54  
55  
56  
57  
58  
59  
60

For peer review only

## References

1. Coronavirus Update (Live): 109,735,851 Cases and 2,420,401 Deaths from COVID-19 Virus Pandemic - Worldometer [Internet]. [cited 2021 Feb 16]. Available from: <https://www.worldometers.info/coronavirus/>
2. Docherty AB, Harrison EM, Green CA, Hardwick HE, Pius R, Norman L, et al. Features of 20 133 UK patients in hospital with covid-19 using the ISARIC WHO Clinical Characterisation Protocol: prospective observational cohort study. Available from: <https://isaric4c.net>
3. Nachtigall I, Lenga P, Józwiak K, Thürmann P, Meier-Hellmann A, Kuhlen R, et al. Clinical course and factors associated with outcomes among 1904 patients hospitalized with COVID-19 in Germany: an observational study. *Clin Microbiol Infect* [Internet]. 2020 [cited 2020 Nov 10]; Available from: <https://reader.elsevier.com/reader/sd/pii/S1198743X20304936?token=088D506A6F15F95832BA1FF82EBE9040EC1E3154088A738F47EBD333697538DEFF79877982A8A7F3857E2695415D62354>
4. Hewitt J, Carter B, Vilches-Moraga A, Quinn TJ, Braude P, Verduri A, et al. The effect of frailty on survival in patients with COVID-19 (COPE): a multicentre, European, observational cohort study. *Lancet Public Heal* [Internet]. 2020 Aug 1 [cited 2020 Nov 10];5(8):e444–51. Available from: [www.thelancet.com/](http://www.thelancet.com/)
5. Baqui P, Bica I, Marra V, Ercole A, van der Schaar M. Ethnic and regional variations in hospital mortality from COVID-19 in Brazil: a cross-sectional observational study. *Lancet Glob Heal* [Internet]. 2020 Aug 1 [cited 2020 Nov 10];8(8):e1018–26. Available from: [www.thelancet.com/lancetghVol](http://www.thelancet.com/lancetghVol)

- 1  
2  
3 6. Jones RC, Ho JC, Kearney H, Glibbery M, Levin DL, Kim J, et al. Evaluating Trends in  
4  
5 COVID-19 Research Activity in Early 2020: The Creation and Utilization of a Novel Open-  
6  
7 Access Database. *Cureus* [Internet]. 2020 Aug 22 [cited 2020 Nov 10];12(8). Available  
8  
9 from: <https://pubmed.ncbi.nlm.nih.gov/32968602/>  
10  
11
- 12  
13 7. Wynants L, Van Calster B, Collins GS, Riley RD, Heinze G, Schuit E, et al. Prediction  
14  
15 models for diagnosis and prognosis of covid-19: Systematic review and critical  
16  
17 appraisal. *BMJ*. 2020;369.  
18  
19
- 20  
21 8. Aguiar M, Ortuondo EM, Bidaurrezaga Van-Dierdonck J, Mar J, Stollenwerk N.  
22  
23 Modelling COVID 19 in the Basque Country from introduction to control measure  
24  
25 response. *Sci Rep* [Internet]. 2020 Dec 14 [cited 2020 Oct 16];10(1):17306. Available  
26  
27 from: <http://www.nature.com/articles/s41598-020-74386-1>  
28  
29
- 30  
31 9. Poblador-Plou B, Carmona-Pírez J, Ioakeim-Skoufa I, Poncel-Falcó A, Bliet-Bueno K,  
32  
33 Cano-Del Pozo M, et al. Baseline chronic comorbidity and mortality in laboratory-  
34  
35 confirmed COVID-19 cases: Results from the PRECOVID study in Spain. *Int J Environ Res*  
36  
37 *Public Health*. 2020;17(14):1–14.  
38  
39
- 40  
41 10. Casas-Rojo JM, Antón-Santos JM, Millán-Núñez-Cortés J, Lumbreras-Bermejo C, Ramos-  
42  
43 Rincón JM, Roy-Vallejo E, et al. Clinical characteristics of patients hospitalized with  
44  
45 COVID-19 in Spain: Results from the SEMI-COVID-19 Registry. *Rev Clin Esp*. 2020;  
46  
47
- 48  
49 11. Working group for the surveillance and control of COVID-19 in Spain. The first wave of  
50  
51 the COVID-19 pandemic in Spain : characterisation of cases and risk factors for severe  
52  
53 outcomes , as at 27 April 2020. *Eurosurveillance* [Internet]. 2020;25(50):1–13. Available  
54  
55 from: <http://dx.doi.org/10.2807/1560-7917.ES.2020.25.50.2001431>  
56  
57
- 58  
59 12. Rubio-Rivas M, Corbella X, Mora-Luján JM, Loureiro-Amigo J, López Sampalo A, Yera  
60  
61 Bergua C, et al. Predicting Clinical Outcome with Phenotypic Clusters in COVID-19



- 1  
2  
3 Pneumonia: An Analysis of 12,066 Hospitalized Patients from the Spanish Registry  
4  
5 SEMI-COVID-19. *J Clin Med.* 2020;9(11):3488.  
6  
7  
8  
9 13. Bengoa R. Transforming health care: an approach to system-wide implementation. *Int J*  
10  
11 *Integr Care.* 2013;13(3).  
12  
13  
14 14. Zhang H, Singer BH. *Recursive Partitioning and Applications.* Second edi. New York:  
15  
16 Springer Series in Statistics; 2010.  
17  
18  
19 15. Orueta JF, Nuño-Solinis R, Mateos M, Vergara I, Grandes G, Esnaola S. Predictive risk  
20  
21 modelling in the Spanish population: A cross-sectional study. *BMC Health Serv Res*  
22  
23 [Internet]. 2013;13(1):1. Available from: BMC Health Services Research  
24  
25  
26 16. Walker, Glenn A, 2002. *Common Statistical Methods for Clinical Research with SAS*  
27  
28 *Examples, Second Edition.* SAS Institute. Cary, NC;  
29  
30  
31 17. Lemon SC, Roy J, Clark MA, Friedmann PD, Rakowski W. Classification and Regression  
32  
33 *Tree Analysis in Public Health: Methodological Review and Comparison with Logistic*  
34  
35 *Regression.* *Ann Behav Med.* 2003;26(3):172–81.  
36  
37  
38  
39 18. Wollenstein-Betech S, Cassandras CG, Paschalidis IC. Personalized Predictive Models for  
40  
41 Symptomatic COVID-19 Patients Using Basic Preconditions: Hospitalizations, Mortality,  
42  
43 and the Need for an ICU or Ventilator. *Int J Med Inform.* 2020 Aug;104258.  
44  
45  
46 19. WHO Team: Social determinants of Health. *World report on ageing and health*  
47  
48 [Internet]. World Health Organization. Luxembourg; 2015 [cited 2020 Dec 9]. Available  
49  
50 from: <https://www.who.int/publications/i/item/world-report-on-ageing-and-health>  
51  
52  
53 20. Gebhard C, Regitz-Zagrosek V, Neuhauser HK, Morgan R, Klein SL. Impact of sex and  
54  
55 gender on COVID-19 outcomes in Europe. Vol. 11, *Biology of Sex Differences.* BioMed  
56  
57 Central Ltd.; 2020.  
58  
59  
60

- 1  
2  
3 21. Rider V, Martocchia A, Cava A La, Moulton VR. Sex Hormones in Acquired Immunity and  
4  
5 Autoimmune Disease. *Front Immunol* | [www.frontiersin.org](http://www.frontiersin.org) [Internet]. 2018;9:2279.  
6  
7 Available from: [www.frontiersin.org](http://www.frontiersin.org)  
8  
9
- 10  
11 22. Mohamed MS, Moulin TC, Helgi, Schiöth B. Sex differences in COVID-19: the role of  
12  
13 androgens in disease severity and progression. *Endocrine* [Internet]. 2020;71:3–8.  
14  
15 Available from: <https://doi.org/10.1007/s12020-020-02536-6>  
16  
17
- 18  
19 23. Dehingia N, Raj A. Sex differences in COVID-19 case fatality: do we know enough?  
20  
21 *Lancet Glob Heal*. 2020 Nov;  
22
- 23  
24 24. Knight SR, Ho A, Pius R, Buchan I, Carson G, Drake TM, et al. Risk stratification of  
25  
26 patients admitted to hospital with covid-19 using the ISARIC WHO Clinical  
27  
28 Characterisation Protocol: development and validation of the 4C Mortality Score. *BMJ*  
29  
30 [Internet]. 2020;370:22. Available from: <http://dx.doi.org/10.1136/bmj.m3339>  
31  
32
- 33  
34 25. Mei Y, Weinberg SE, Zhao L, Frink A, Qi C, Behdad A, et al. Risk stratification of  
35  
36 hospitalized COVID-19 patients through comparative studies of laboratory results with  
37  
38 influenza. *EClinicalMedicine* [Internet]. 2020;26:100475. Available from:  
39  
40 <https://doi.org/10.1016/j.eclinm.2020.100475>  
41  
42
- 43  
44 26. Starke KR, Petereit-Haack G, Schubert M, Kämpf D, Schliebner A, Hegewald J, et al. The  
45  
46 Age-Related Risk of Severe Outcomes Due to COVID-19 Infection: A Rapid Review,  
47  
48 Meta-Analysis, and Meta-Regression. Available from: [www.mdpi.com/journal/ijerph](http://www.mdpi.com/journal/ijerph)  
49
- 50  
51 27. Koralnik IJ, Tyler KL. COVID-19: A Global Threat to the Nervous System. *Ann Neurol*.  
52  
53 2020;88(1):1–11.  
54
- 55  
56 28. Herman C, Mayer K, Sarwal A, Org N, Covid19 /. Scoping review of prevalence of  
57  
58 neurologic comorbidities in patients hospitalized for COVID-19. 2020;  
59
- 60  
29. Romagnolo A, Balestrino R, Imbalzano G, Ciccone G, Riccardini · Franco, Carlo ·, et al.

- 1  
2  
3 Neurological comorbidity and severity of COVID-19. *J Neurol* [Internet]. 123AD;1:3.  
4  
5 Available from: <https://doi.org/10.1007/s00415-020-10123-y>  
6  
7
- 8 30. Rossi R, Coppi F, Talarico M, Boriani G. Protective role of chronic treatment with direct  
9 oral anticoagulants in elderly patients affected by interstitial pneumonia in COVID-19  
10 era. *Eur J Intern Med*. 2020;77(May):158–60.  
11  
12
- 13 31. Schiavone M, Gasperetti A, Mancone M, Curnis A, Mascioli G, Mitacchione G, et al. Oral  
14 anticoagulation and clinical outcomes in COVID-19: An Italian multicenter experience.  
15 *Int J Cardiol*. 2020;323:276–80.  
16  
17
- 18 32. Hanff TC, Mohareb AM, Giri J, Cohen JB, Chirinos JA. Thrombosis in COVID-19. *Am J*  
19 *Hematol*. 2020;95(12):1578–89.  
20  
21
- 22 33. Vivas D, Roldán V, Esteve-Pastor MA, Roldán I, Tello-Montoliu A, Ruiz-Nodar JM, et al.  
23 Recommendations on antithrombotic treatment during the COVID-19 pandemic.  
24 Position statement of the Working Group on Cardiovascular Thrombosis of the Spanish  
25 Society of Cardiology. *Rev Esp Cardiol*. 2020;73(9):749–57.  
26  
27
- 28 34. Oakley P, Kisely S, Baxter A, Harris M, Desoe J, Dziouba A, et al. Increased mortality  
29 among people with schizophrenia and other non-affective psychotic disorders in the  
30 community: A systematic review and meta-analysis. *J Psychiatr Res* [Internet].  
31 2018;102(April):245–53. Available from:  
32 <https://doi.org/10.1016/j.jpsychires.2018.04.019>  
33  
34
- 35 35. Simon L, Hashmi M, Callahan A. Neuroleptic Malignant Syndrome [Internet]. [Updated  
36 2020 Nov 20]. In: *StatPearls* [Internet]. Treasure Island (FL): StatPearls Publishing; 2020  
37 Jan-; Available from: <https://www.ncbi.nlm.nih.gov/books/NBK482282/>  
38  
39
- 40 36. Taquet M, Luciano S, Geddes JR, Harrison PJ. Bidirectional associations between COVID-  
41 19 and psychiatric disorder: retrospective cohort studies of 62 354 COVID-19 cases in  
42  
43  
44  
45  
46  
47  
48  
49  
50  
51  
52  
53  
54  
55  
56  
57  
58  
59  
60

- 1  
2  
3 the USA. *The Lancet Psychiatry* [Internet]. 2020 [cited 2020 Dec 10]; Available from:  
4  
5 <https://doi.org/10.1016/S2215-0366>  
6  
7
- 8 37. Nemani K, Li C, Olfson M, Blessing EM, Razavian N, Chen ; Ji, et al. Association of  
9  
10 Psychiatric Disorders With Mortality Among Patients With COVID-19 Multimedia  
11  
12 Supplemental content. *JAMA Psychiatry* [Internet]. 2021; Available from:  
13  
14 <https://jamanetwork.com/>  
15  
16
- 17 38. Clark A, Jit M, Warren-Gash C, Guthrie B, Wang HHX, Mercer SW, et al. Global, regional,  
18  
19 and national estimates of the population at increased risk of severe COVID-19 due to  
20  
21 underlying health conditions in 2020: a modelling study. *Lancet Glob Heal*. 2020 Aug  
22  
23 1;8(8):e1003–17.  
24  
25
- 26 39. Ghahramani S, Tabrizi R, Lankarani KB, Kashani SMA, Rezaei S, Zeidi N, et al. Laboratory  
27  
28 features of severe vs. non-severe COVID-19 patients in Asian populations: A systematic  
29  
30 review and meta-analysis. Vol. 25, *European Journal of Medical Research*. BioMed  
31  
32 Central; 2020.  
33  
34
- 35 40. Ou M, Zhu J, Ji P, Li H, Zhong Z, Li B, et al. Risk factors of severe cases with COVID-19: a  
36  
37 meta-analysis. *Epidemiol Infect*. 2020 Aug 12;148:e175.  
38  
39
- 40 41. Hellgren Z, Serrano I. Transnationalism and Financial Crisis: The Hampered Migration  
41  
42 Projects of Female Domestic Workers in Spain. Available from:  
43  
44 [www.mdpi.com/journal/socsci](http://www.mdpi.com/journal/socsci)  
45  
46
- 47 42. Lázaro-Pérez C, Ángel Martínez-López J, Gómez-Galán J, López-Meneses E. Anxiety  
48  
49 About the Risk of Death of Their Patients in Health Professionals in Spain: Analysis at  
50  
51 the Peak of the COVID-19 Pandemic. Available from: [www.mdpi.com/journal/ijerph](http://www.mdpi.com/journal/ijerph)  
52  
53  
54  
55
- 56 43. Zimmerman R, Nowalk MP, Bear T, Taber R, Sax T, Eng H, et al. Proposed Clinical  
57  
58 Indicators for Efficient Screening and Testing for COVID-19 Infection from Classification  
59  
60

1  
2  
3  
4  
5  
6  
7  
8  
9  
10  
11  
12  
13  
14  
15  
16  
17  
18  
19  
20  
21  
22  
23  
24  
25  
26  
27  
28  
29  
30  
31  
32  
33  
34  
35  
36  
37  
38  
39  
40  
41  
42  
43  
44  
45  
46  
47  
48  
49  
50  
51  
52  
53  
54  
55  
56  
57  
58  
59  
60

and Regression Trees (CART) Analysis [Internet]. medRxiv : the preprint server for  
health sciences. 2020. Available from: <https://doi.org/10.1101/2020.05.11.20097980>

For peer review only

**Table 1:** Baseline information of the COVID-19 cases during the first wave of the pandemic

| Variables                           | Total (n=14197) | Primary Care (n=9722) | Hospital/ICU (n=3710) | Death (n=765) | p-value |
|-------------------------------------|-----------------|-----------------------|-----------------------|---------------|---------|
| <b>Age; mean (SD)</b>               | 53.7 (17.4)     | 48.0 (14.4)           | 62.8 (16.1)           | 82.3 (10.5)   | <0.0001 |
| <b>Sex</b>                          |                 |                       |                       |               |         |
| Male                                | 5520 (38.9)     | 3073 (31.6)           | 2031 (54.7)           | 416 (54.4)    | <0.0001 |
| Female                              | 8677 (61.1)     | 6649 (68.4)           | 1679 (45.3)           | 349 (45.6)    |         |
| <b>Health care complexity</b>       |                 |                       |                       |               |         |
| <i>Missing information</i>          | 405 (2.9)       | 307 (3.2)             | 86 (2.3)              | 12 (1.6)      |         |
| Prevention and promotion            | 3878 (27.3)     | 3399 (36.1)           | 470 (12.9)            | 9 (1.2)       | <0.0001 |
| Self-management support             | 6821 (48.0)     | 4989 (52.9)           | 1675 (46.2)           | 157 (20.8)    |         |
| Disease management                  | 2252 (15.9)     | 891 (9.4)             | 1050 (28.9)           | 311 (41.3)    |         |
| Case management                     | 841 (5.9)       | 136 (1.4)             | 429 (11.8)            | 276 (36.6)    |         |
| <b>Income level</b>                 |                 |                       |                       |               |         |
| <i>Missing information</i>          | 854 (6.0)       | 251 (2.6)             | 130 (3.5)             | 473 (61.8)    |         |
| <18.000 euros                       | 6536 (46.0)     | 4297 (45.3)           | 2038 (56.9)           | 201 (68.8)    | <0.0001 |
| 18.000-100.000 euros                | 6670 (47.0)     | 5074 (53.5)           | 1507 (42.0)           | 89 (30.4)     |         |
| >100.000 euros                      | 137 (1.0)       | 100 (1.0)             | 35 (0.9)              | 2 (0.6)       |         |
| <b>Flu vaccination in 2019: yes</b> |                 |                       |                       |               |         |
| All vaccinated cases                | 3336 (23.5)     | 1322 (13.6)           | 1446 (39.0)           | 568 (74.2)    | <0.0001 |
| Vaccinated cases <65 years old      | 1103 (10.1)     | 814 (9.2)             | 265 (13.6)            | 24 (42.8)     | <0.0001 |
| Vaccinated cases ≥ 65 years old     | 2233 (66.5)     | 508 (57.7)            | 1181 (66.9)           | 544 (76.7)    | <0.0001 |

Data are frequency (percentage), unless otherwise stated. For variables with missing information, percentages and statistical comparisons are based on valid data only. Presented p-values are based on one-way ANOVA for the variable of age and the chi-square test for the categorical variables. Cases <65 year and ≥ 65 years were n=10843 and n=3354, respectively. Jonckheere-Terpstra and Mantel-Haenszel chi-square test for trend also resulted in p<0.0001 in all comparisons.

**Table 2:** Chronic medication consumption of the COVID-19 sample.

|                                                                         | <b>Total<br/>(n=14197)</b> | <b>Primary Care<br/>(n=9722)</b> | <b>Hospital/ICU<br/>(n=3710)</b> | <b>Death<br/>(n=765)</b> | <b>p-value</b> |
|-------------------------------------------------------------------------|----------------------------|----------------------------------|----------------------------------|--------------------------|----------------|
| Medication (ATC type)                                                   |                            |                                  |                                  |                          |                |
| Alimentary tract and metabolism (A)                                     | 4685 (33.0)                | 2234 (23.0)                      | 1837 (49.5)                      | 614 (80.3)               | <0.0001        |
| Blood and blood forming organs (B)                                      | 2414 (17.0)                | 889 (9.1)                        | 1057 (28.5)                      | 468 (61.2)               | <0.0001        |
| Cardiovascular system (C)                                               | 4294 (30.2)                | 1813 (18.6)                      | 1893 (51.0)                      | 588 (76.9)               | <0.0001        |
| Dermatologicals (D)                                                     | 1765 (12.4)                | 1032 (10.6)                      | 581 (15.7)                       | 152 (19.9)               | <0.0001        |
| Genitourinary system and sex hormones (G)                               | 1690 (11.9)                | 1050 (10.8)                      | 505 (13.6)                       | 135 (17.6)               | <0.0001        |
| Systemic Hormonal preparations, excluding sex hormones and insulins (H) | 1504 (10.6)                | 876 (9.0)                        | 492 (13.3)                       | 136 (17.8)               | <0.0001        |
| Antiinfectives for systemic use (J)                                     | 223 (1.6)                  | 122 (1.3)                        | 73 (2.0)                         | 28 (3.7)                 | <0.0001        |
| Antineoplastic and immunomodulating agents (L)                          | 360 (2.5)                  | 165 (1.7)                        | 141 (3.8)                        | 54 (7.1)                 | <0.0001        |
| Musculo-Skeletal system (M)                                             | 3137 (22.1)                | 2010 (20.7)                      | 952 (25.7)                       | 175 (22.9)               | <0.0001        |
| Nervous System (N)                                                      | 5494 (38.7)                | 2906 (29.9)                      | 1931 (52.0)                      | 657 (85.9)               | <0.0001        |
| Antiparasitic products, insecticides and repellents (P)                 | 42 (0.3)                   | 24 (0.2)                         | 15 (0.4)                         | 3 (0.4)                  | 0.284          |
| Respiratory System (R)                                                  | 2603 (18.3)                | 1517 (15.6)                      | 864 (23.3)                       | 222 (29.0)               | <0.0001        |
| Sensory Organs (S)                                                      | 863 (6.1)                  | 443 (4.6)                        | 297 (8.0)                        | 123 (16.1)               | <0.0001        |
| Various (V)                                                             | 188 (1.3)                  | 45 (0.5)                         | 58 (1.6)                         | 85 (11.1)                | <0.0001        |
| Polypharmacy: yes                                                       | 2921 (20.5)                | 935 (9.6)                        | 1357 (36.5)                      | 629 (82.2)               | <0.0001        |
| Num. ATC types consumed: median (Q1,Q3)                                 | 2 (0, 3)                   | 1 (0, 3)                         | 3 (1, 4)                         | 5 (3, 6)                 | <0.0001        |

Data are frequency (percentage), unless otherwise stated. Q1, Q3: interquartile range values. ATC: Anatomical Therapeutic Chemicals. Presented p-values are based on the Chi-square test. The Jonckheere-Terpstra and Mantel-Haenszel chi-square test for trend resulted in very similar results in all comparisons.

**Table 3: Chronic diseases of the COVID-19 cases in the three outcome groups**

| Disease                                                                             | Total<br>(n=14197) | Primary Care<br>(n=9722) | Hospital/ICU<br>(n=3710) | Death<br>(n=765) | p-value |
|-------------------------------------------------------------------------------------|--------------------|--------------------------|--------------------------|------------------|---------|
| <b>Infectious disease</b>                                                           |                    |                          |                          |                  |         |
| HIV infection                                                                       | 23 (0.2)           | 7 (0.1)                  | 12 (0.3)                 | 4 (0.5)          | 0.0002  |
| Liver disease and cirrhosis                                                         | 133 (0.9)          | 49 (0.5)                 | 72 (1.9)                 | 12 (1.6)         | <0.0001 |
| <b>Malignant neoplasm</b>                                                           |                    |                          |                          |                  |         |
|                                                                                     | 918 (6.4)          | 364 (3.7)                | 410 (11.0)               | 144 (18.8)       | <0.0001 |
| <b>Endocrine diseases</b>                                                           |                    |                          |                          |                  |         |
| Subclinical hypothyroidism without treatment                                        | 1101 (7.8)         | 747 (7.7)                | 294 (7.9)                | 60 (7.8)         | 0.892   |
| Diabetes Mellitus                                                                   | 1213 (8.5)         | 395 (4.1)                | 606 (16.3)               | 212 (27.7)       | <0.0001 |
| <b>Diseases of the blood and blood-forming organs</b>                               |                    |                          |                          |                  |         |
|                                                                                     | 1602 (11.3)        | 930 (9.6)                | 492 (13.3)               | 180 (23.5)       | <0.0001 |
| <b>Mental disorders</b>                                                             |                    |                          |                          |                  |         |
| Psychoses                                                                           | 412 (2.9)          | 138 (1.4)                | 143 (3.9)                | 131 (17.1)       | <0.0001 |
| Neurotic disorders, personality disorders, and other nonpsychotic mental disorders  | 4258 (30.0)        | 2926 (30.1)              | 1096 (29.5)              | 236 (30.8)       | 0.712   |
| Mental retardation                                                                  | 39 (0.3)           | 24 (0.2)                 | 14 (0.4)                 | 1 (0.1)          | 0.319   |
| <b>Nervous system diseases</b>                                                      |                    |                          |                          |                  |         |
| Dementia                                                                            | 126 (0.8)          | 20 (0.2)                 | 32 (0.8)                 | 74 (9.6)         | <0.0001 |
| Other hereditary and degenerative diseases of the central nervous system            | 307 (2.1)          | 127 (1.3)                | 122 (3.2)                | 58 (7.5)         | <0.0001 |
| <b>Diseases of the circulatory system</b>                                           |                    |                          |                          |                  |         |
| Hypertensive disease                                                                | 2988 (21.0)        | 1177 (12.1)              | 1364 (36.8)              | 447 (58.4)       | <0.0001 |
| Ischemic heart disease                                                              | 448 (3.2)          | 111 (1.1)                | 237 (6.4)                | 100 (13.1)       | <0.0001 |
| Cerebrovascular disease                                                             | 611 (4.3)          | 189 (1.9)                | 266 (7.2)                | 156 (20.4)       | <0.0001 |
| Heart failure & Atrial fibrillation and flutter                                     | 709 (5.0)          | 132 (1.4)                | 361 (9.7)                | 216 (28.2)       | <0.0001 |
| Acute pulmonary heart disease & other venous embolism and thrombosis                | 150 (1.1)          | 49 (0.5)                 | 73 (2.0)                 | 28 (3.7)         | <0.0001 |
| Arterial embolism and thrombosis                                                    | 39 (0.3)           | 17 (0.2)                 | 17 (0.5)                 | 5 (0.7)          | 0.002   |
| <b>Respiratory disease</b>                                                          |                    |                          |                          |                  |         |
| Allergic asthma                                                                     | 354 (2.4)          | 258 (2.6)                | 88 (2.3)                 | 8 (1.0)          | 0.019   |
| Chronic obstructive pulmonary disease and allied conditions (excl. allergic asthma) | 1190 (8.3)         | 630 (6.4)                | 432 (11.6)               | 128 (16.7)       | <0.0001 |
| Pneumoconioses and other lung diseases due to external agents                       | 20 (0.1)           | 9 (0.1)                  | 8 (0.2)                  | 3 (0.4)          | 0.038   |
| <b>Diseases of the Digestive system</b>                                             |                    |                          |                          |                  |         |
| Diseases of esophagus, stomach and duodenum                                         | 1481 (10.4)        | 907 (9.3)                | 468 (12.6)               | 106 (13.9)       | <0.0001 |
| Non-infectious enteritis and colitis                                                | 643 (4.5)          | 500 (5.1)                | 121 (3.3)                | 22 (2.9)         | <0.0001 |
| Regional enteritis & Ulcerative Colitis                                             | 73 (0.5)           | 51 (0.5)                 | 16 (0.4)                 | 6 (0.8)          | 0.447   |
| <b>Disease of the genitourinary system</b>                                          |                    |                          |                          |                  |         |
| Chronic kidney disease                                                              | 398 (2.8)          | 87 (0.9)                 | 188 (5.1)                | 123 (16.1)       | <0.0001 |
| <b>Diseases of the skin and subcutaneous tissue</b>                                 |                    |                          |                          |                  |         |
| Psoriasis                                                                           | 315 (2.2)          | 180 (1.9)                | 113 (3.0)                | 22 (2.9)         | <0.0001 |
| <b>Diseases of the musculoskeletal system and connective tissue</b>                 |                    |                          |                          |                  |         |
| Systemic lupus erythematosus                                                        | 36 (0.3)           | 24 (0.2)                 | 10 (0.3)                 | 2 (0.3)          | 0.972   |
| Rheumatoid arthritis and other inflammatory polyarthropathies                       | 125 (0.9)          | 59 (0.6)                 | 55 (1.5)                 | 11 (1.4)         | <0.0001 |
| Arthropathy associated with other disorders classified elsewhere                    | 8 (0.1)            | 5 (0.1)                  | 1 (0.0)                  | 2 (0.3)          | 0.042   |
| Multimorbidity: $\geq 2$ chronic diseases                                           | 5326 (37.5)        | 2715 (27.9)              | 1975 (53.2)              | 636 (83.1)       | <0.0001 |
| Total number of chronic diseases                                                    |                    |                          |                          |                  |         |
| Median (Q1, Q3)                                                                     | 1 (0, 2)           | 1 (0, 2)                 | 2 (1, 3)                 | 3 (2, 4)         | <0.0001 |

Data are frequency (percentage) unless otherwise stated; Q1, Q3: interquartile range values. Presented p-values are based on the Chi-square test. The Jonckheere-Terpstra and Mantel-Haenszel chi-square test for trend resulted in very similar results in all comparisons.



1  
2  
3 **Fig 1: CART model without psychosis.** PC: primary care; Hos/ICU: hospital and intensive care unit.  
4 Percentages up to 3 decimal places are given. Due to rounding, node percentages may not add to 100%.  
5 Pre/Pro & Self: Prevention and promotion, and Self-management support. Disease & Case: Disease  
6 management and Case management. ATC: Anatomical Therapeutic Chemical. White nodes represent  
7 groups with a higher percentage of PC care. Grey nodes represent groups with a higher percentage of  
8 Hospital/ICU admission.  
9

10  
11  
12 **Fig 2: CART model with psychosis.** PC: primary care; Hos/ICU: hospital and intensive care unit. Percentages  
13 up to 3 decimal places are given. Due to rounding, node percentages may not add to 100%. Pre/Pro & Self:  
14 Prevention and promotion, and Self-management support. Disease & Case: Disease management and Case  
15 management. ATC: Anatomical Therapeutic Chemical. White nodes represent groups with a higher  
16 percentage of PC care. Grey nodes represent groups with a higher percentage of Hospital/ICU admission,  
17 and grey stripes nodes groups with a higher percentage of Death.  
18  
19  
20  
21  
22  
23  
24  
25  
26  
27  
28  
29  
30  
31  
32  
33  
34  
35  
36  
37  
38  
39  
40  
41  
42  
43  
44  
45  
46  
47  
48  
49  
50  
51  
52  
53  
54  
55  
56  
57  
58  
59  
60

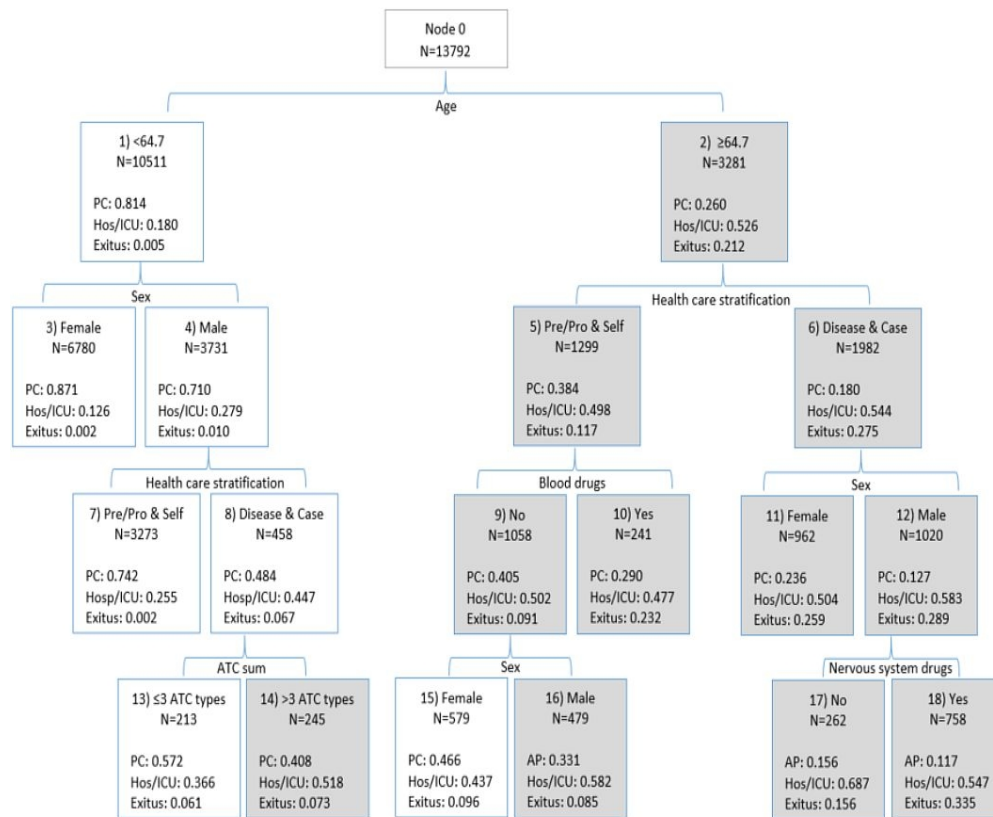

CART model without psychosis. PC: primary care; Hos/ICU: hospital and intensive care unit. Percentages up to 3 decimal places are given. Due to rounding, node percentages may not add to 100%. Pre/Pro & Self: Prevention and promotion, and Self-management support. Disease & Case: Disease management and Case management. ATC: Anatomical Therapeutic Chemical. White nodes represent groups with a higher percentage of PC care. Grey nodes represent groups with a higher percentage of Hospital/ICU admission.

90x90mm (300 x 300 DPI)

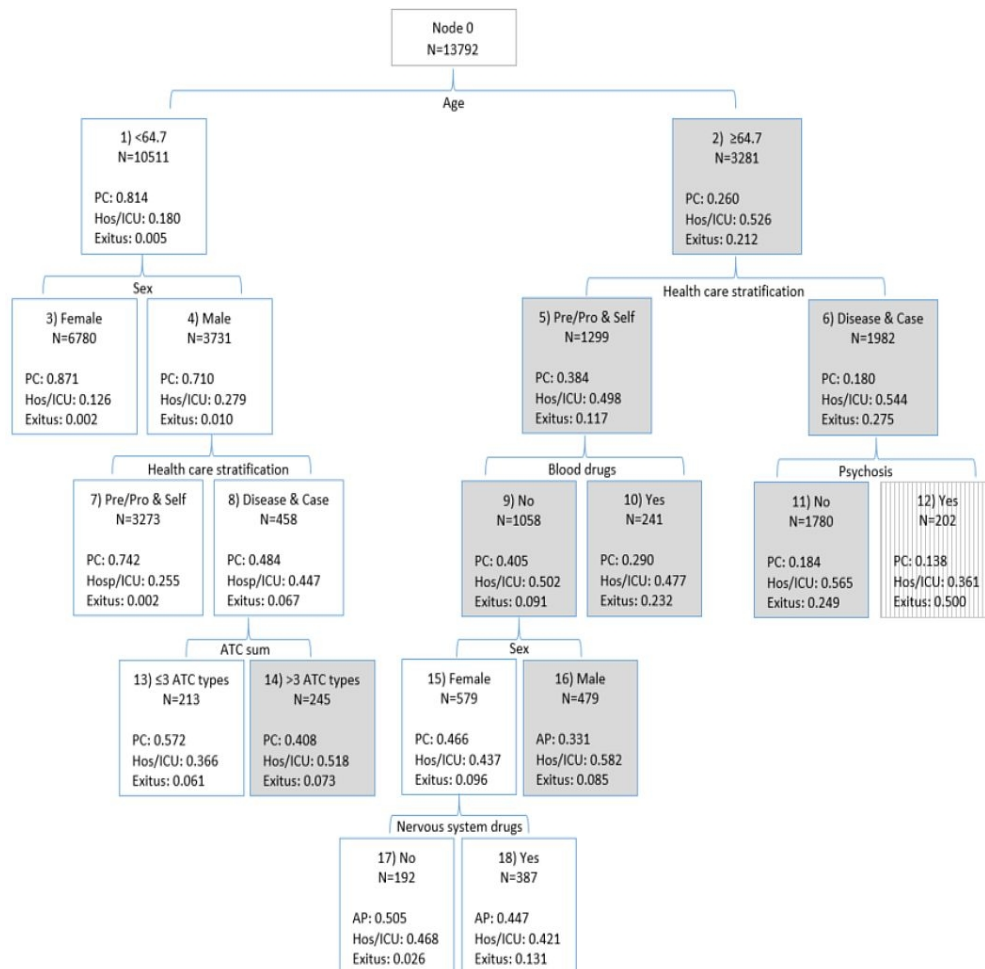

CART model with psychosis. PC: primary care; Hos/ICU: hospital and intensive care unit. Percentages up to 3 decimal places are given. Due to rounding, node percentages may not add to 100%. Pre/Pro & Self: Prevention and promotion, and Self-management support. Disease & Case: Disease management and Case management. ATC: Anatomical Therapeutic Chemical. White nodes represent groups with a higher percentage of PC care. Grey nodes represent groups with a higher percentage of Hospital/ICU admission, and grey stripes nodes groups with a higher percentage of Death.

90x90mm (300 x 300 DPI)

STROBE Statement—checklist of items that should be included in reports of *cross-sectional studies*

|                              | Item No | Recommendation                                                                                                                                                                       | page |
|------------------------------|---------|--------------------------------------------------------------------------------------------------------------------------------------------------------------------------------------|------|
| <b>Title and abstract</b>    | 1       | (a) Indicate the study's design with a commonly used term in the title or the abstract                                                                                               | 1, 2 |
|                              |         | (b) Provide in the abstract an informative and balanced summary of what was done and what was found                                                                                  | 2    |
| <b>Introduction</b>          |         |                                                                                                                                                                                      |      |
| Background/rationale         | 2       | Explain the scientific background and rationale for the investigation being reported                                                                                                 | 3    |
| Objectives                   | 3       | State specific objectives, including any prespecified hypotheses                                                                                                                     | 3,4  |
| <b>Methods</b>               |         |                                                                                                                                                                                      |      |
| Study design                 | 4       | Present key elements of study design early in the paper                                                                                                                              | 4,5  |
| Setting                      | 5       | Describe the setting, locations, and relevant dates, including periods of recruitment, exposure, follow-up, and data collection                                                      | 4    |
| Participants                 | 6       | (a) <i>Cross-sectional study</i> —Give the eligibility criteria, and the sources and methods of selection of participants                                                            | 4,5  |
| Variables                    | 7       | Clearly define all outcomes, exposures, predictors, potential confounders, and effect modifiers. Give diagnostic criteria, if applicable                                             | 4,5  |
| Data sources/<br>measurement | 8*      | For each variable of interest, give sources of data and details of methods of assessment (measurement). Describe comparability of assessment methods if there is more than one group | 4,5  |
| Bias                         | 9       | Describe any efforts to address potential sources of bias                                                                                                                            |      |
| Study size                   | 10      | Explain how the study size was arrived at                                                                                                                                            | 4    |
| Quantitative variables       | 11      | Explain how quantitative variables were handled in the analyses. If applicable, describe which groupings were chosen and why                                                         | 4    |
| Statistical methods          | 12      | (a) Describe all statistical methods, including those used to control for confounding                                                                                                | 5, 6 |
|                              |         | (b) Describe any methods used to examine subgroups and interactions                                                                                                                  | 5, 6 |
|                              |         | (c) Explain how missing data were addressed                                                                                                                                          | 6    |
|                              |         | (d) <i>Cross-sectional study</i> —If applicable, describe analytical methods taking account of sampling strategy                                                                     | 5, 6 |
|                              |         | (e) Describe any sensitivity analyses                                                                                                                                                |      |

Continued on next page

| <b>Results</b>           |     |                                                                                                                                                                                                              | <b>page</b>       |
|--------------------------|-----|--------------------------------------------------------------------------------------------------------------------------------------------------------------------------------------------------------------|-------------------|
| Participants             | 13* | (a) Report numbers of individuals at each stage of study—eg numbers potentially eligible, examined for eligibility, confirmed eligible, included in the study, completing follow-up, and analysed            | 6                 |
|                          |     | (b) Give reasons for non-participation at each stage                                                                                                                                                         | 6                 |
|                          |     | (c) Consider use of a flow diagram                                                                                                                                                                           |                   |
| Descriptive data         | 14* | (a) Give characteristics of study participants (eg demographic, clinical, social) and information on exposures and potential confounders                                                                     | Table 1           |
|                          |     | (b) Indicate number of participants with missing data for each variable of interest                                                                                                                          | Table 1           |
| Outcome data             | 15* | Report numbers of outcome events or summary measures                                                                                                                                                         |                   |
| Main results             | 16  | (a) Give unadjusted estimates and, if applicable, confounder-adjusted estimates and their precision (eg, 95% confidence interval). Make clear which confounders were adjusted for and why they were included | 6, 8, 9, figure 1 |
|                          |     | (b) Report category boundaries when continuous variables were categorized                                                                                                                                    | 6, figure 1       |
|                          |     | (c) If relevant, consider translating estimates of relative risk into absolute risk for a meaningful time period                                                                                             |                   |
| Other analyses           | 17  | Report other analyses done—eg analyses of subgroups and interactions, and sensitivity analyses                                                                                                               | 8, 9              |
| <b>Discussion</b>        |     |                                                                                                                                                                                                              |                   |
| Key results              | 18  | Summarise key results with reference to study objectives                                                                                                                                                     | 10                |
| Limitations              | 19  | Discuss limitations of the study, taking into account sources of potential bias or imprecision. Discuss both direction and magnitude of any potential bias                                                   | 12, 13            |
| Interpretation           | 20  | Give a cautious overall interpretation of results considering objectives, limitations, multiplicity of analyses, results from similar studies, and other relevant evidence                                   | 10-12             |
| Generalisability         | 21  | Discuss the generalisability (external validity) of the study results                                                                                                                                        | 10-12             |
| <b>Other information</b> |     |                                                                                                                                                                                                              |                   |
| Funding                  | 22  | Give the source of funding and the role of the funders for the present study and, if applicable, for the original study on which the present article is based                                                | 14                |

\*Give information separately for cases and controls in case-control studies and, if applicable, for exposed and unexposed groups in cohort and cross-sectional studies.

**Note:** An Explanation and Elaboration article discusses each checklist item and gives methodological background and published examples of transparent reporting. The STROBE checklist is best used in conjunction with this article (freely available on the Web sites of PLoS Medicine at <http://www.plosmedicine.org/>, Annals of Internal Medicine at <http://www.annals.org/>, and Epidemiology at <http://www.epidem.com/>). Information on the STROBE Initiative is available at [www.strobe-statement.org](http://www.strobe-statement.org).
